# Supplementary material for: Identification of domestication-related loci associated with flowering time and seed size in soybean with the RAD-seq genotyping method
Source: PubMed Central journal article supplement (PMC4369735; doi:10.1038/srep09350), 2015-03-23
Supplement: srep09350-s1.pdf [file srep09350-s1.pdf]

# **Identification of domestication-related loci associated with flowering time and seed size in soybean with the RAD-seq genotyping method**

Ling Zhou<sup>1,☉</sup>, Shi-Bo Wang<sup>1,☉</sup>, Jianbo Jian<sup>2,☉</sup>, Qing-Chun Geng<sup>1</sup>, Jia Wen<sup>1</sup>, Qijian Song<sup>3</sup>, Zhenzhen Wu<sup>2</sup>,  
Guang-Jun Li<sup>4</sup>, Yu-Qin Liu<sup>5</sup>, Jim M. Dunwell<sup>6</sup>, Jin Zhang<sup>1</sup>, Jian-Ying Feng<sup>1</sup>, Yuan Niu<sup>1</sup>,  
Li Zhang<sup>1</sup>, Wen-Long Ren<sup>1</sup> & Yuan-Ming Zhang<sup>1,7,\*</sup>

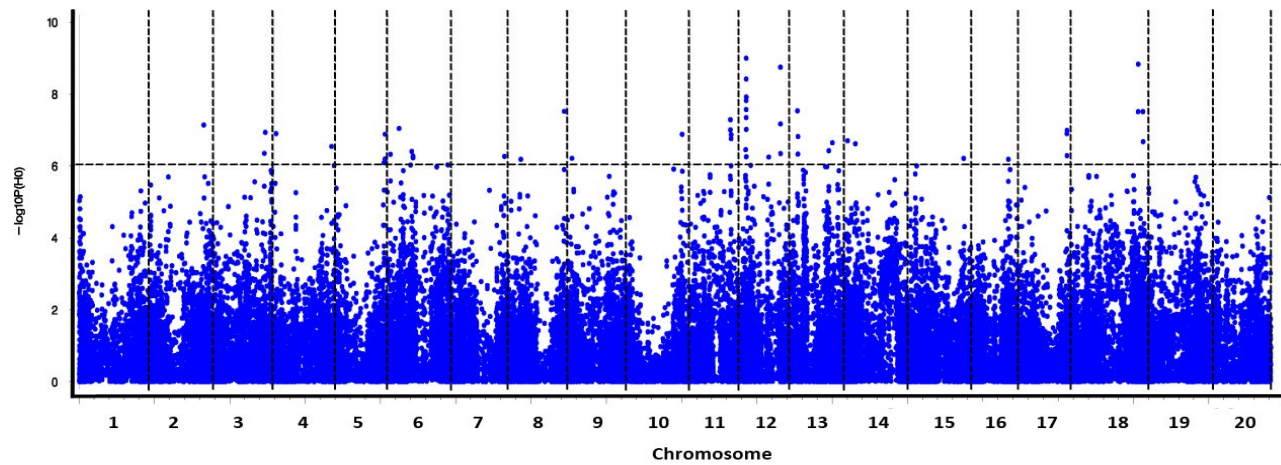

First flowering time in 2010

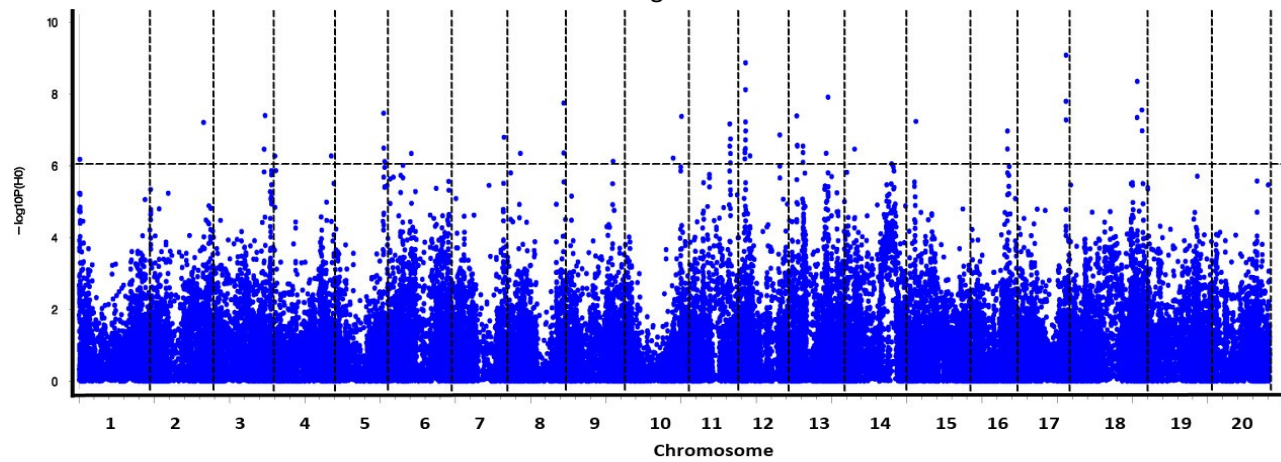

First flowering time in 2011

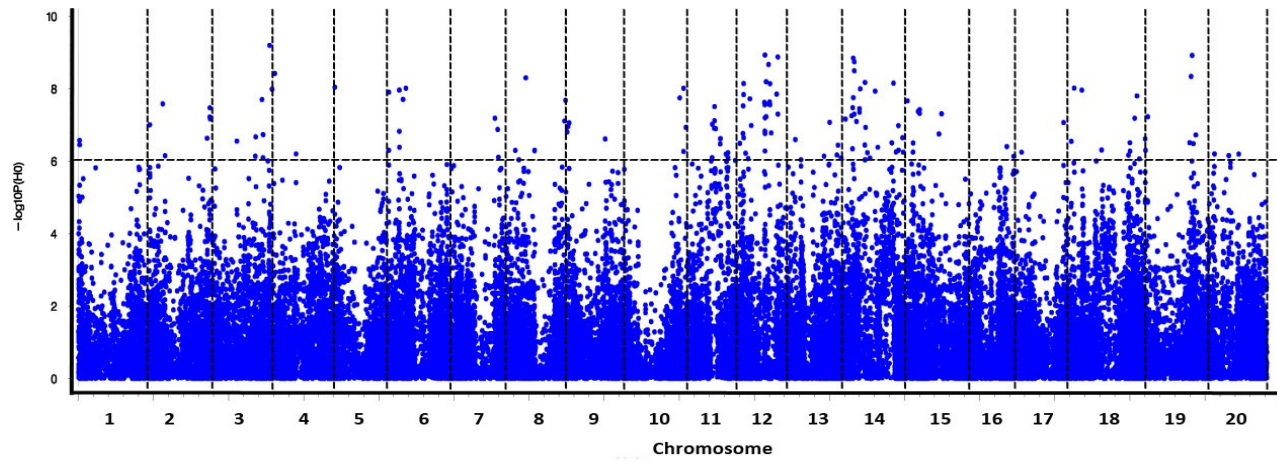

First flowering time in 2012

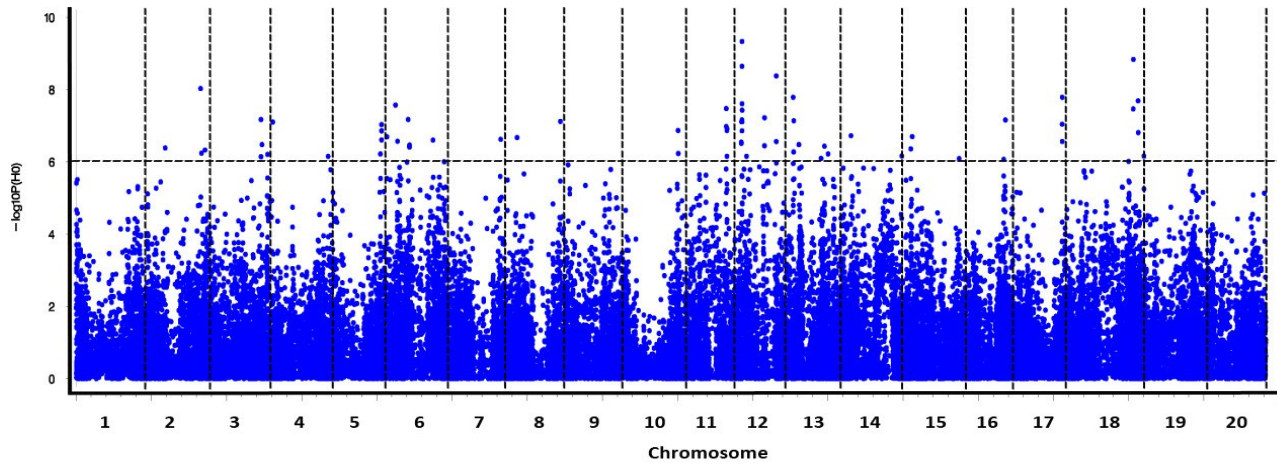

Full flowering time in 2010

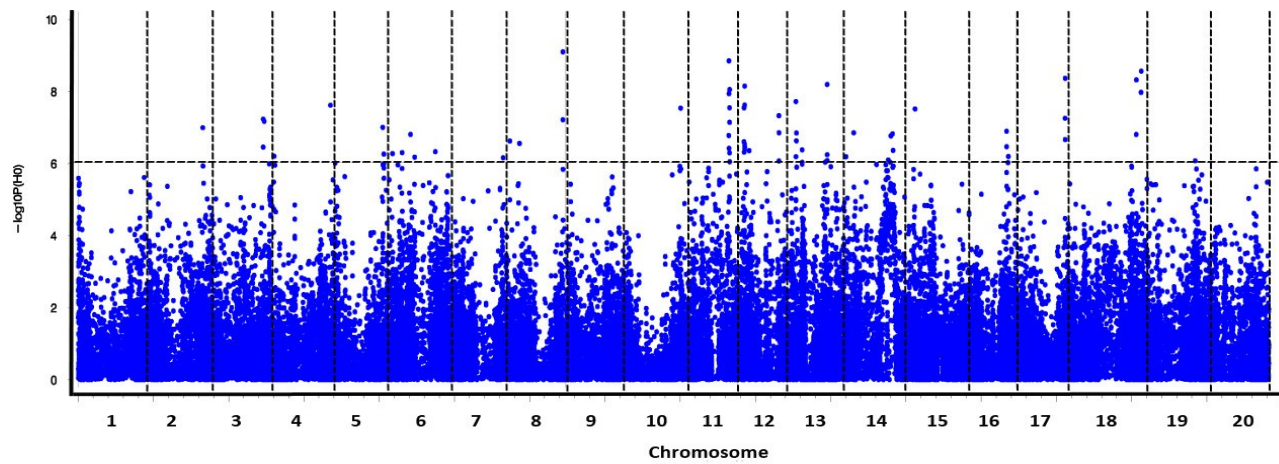

Full flowering time in 2011

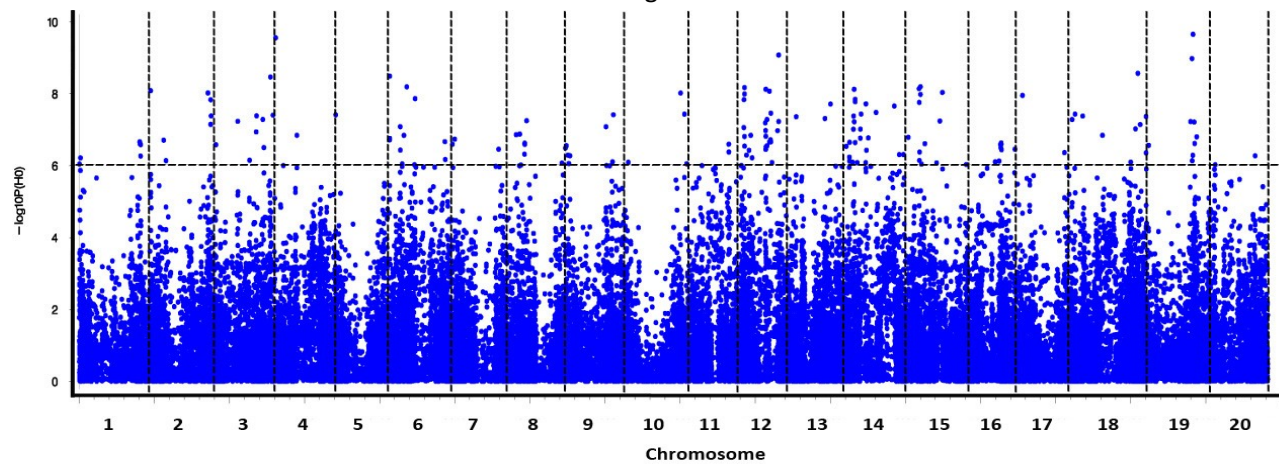

Full flowering time in 2012



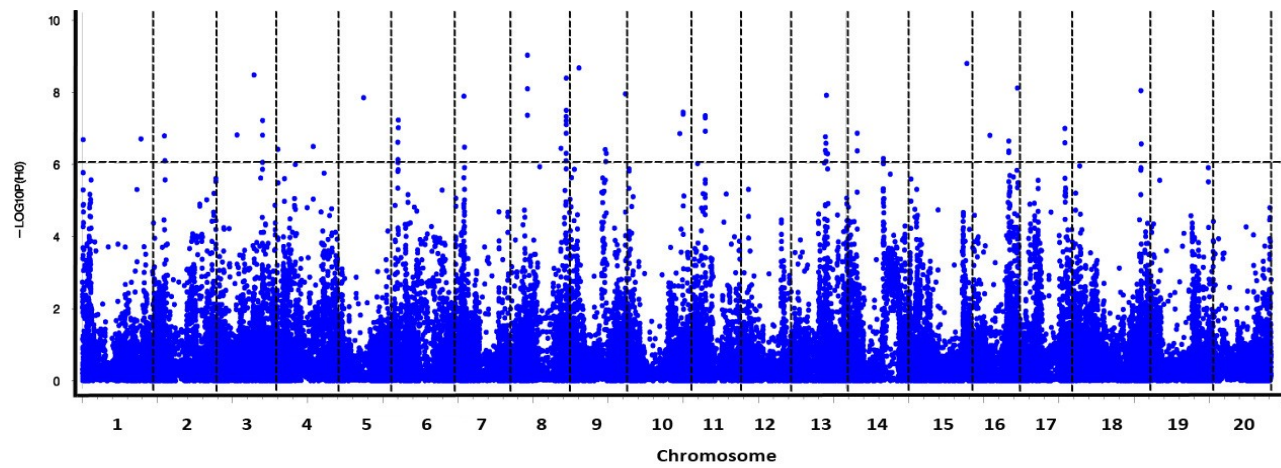

Seed length in 2008

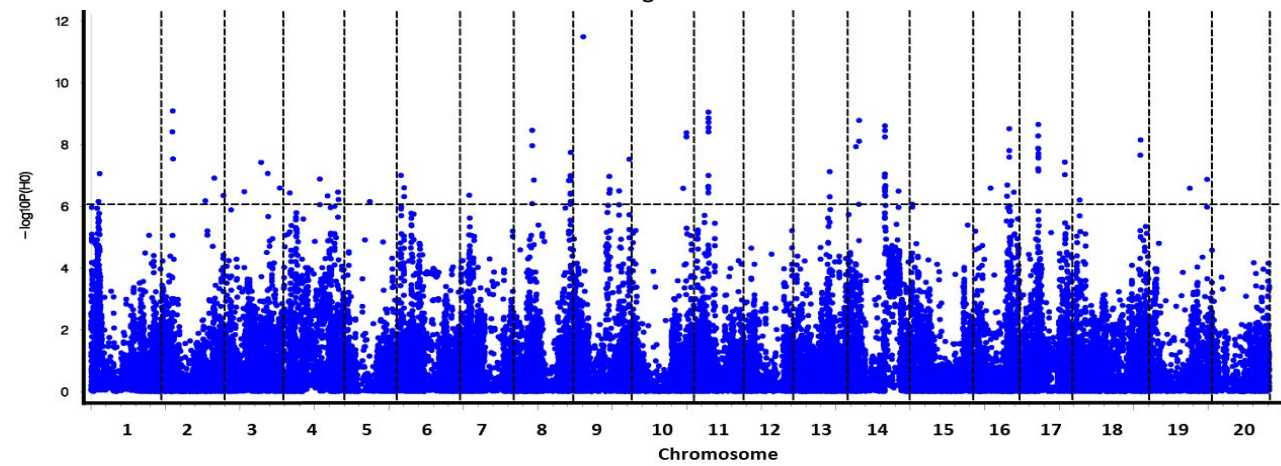

Seed length in 2009

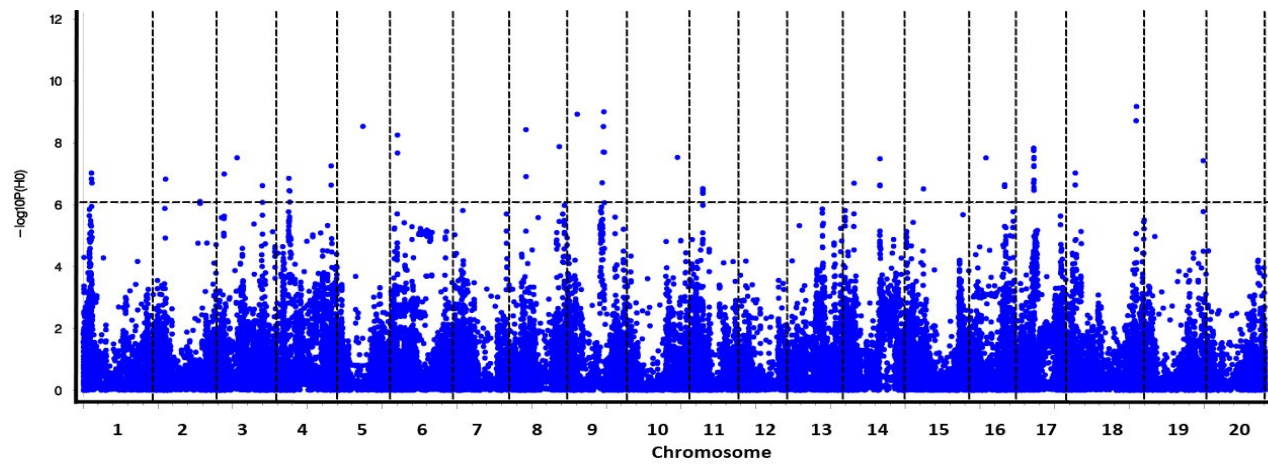

Seed length in 2010

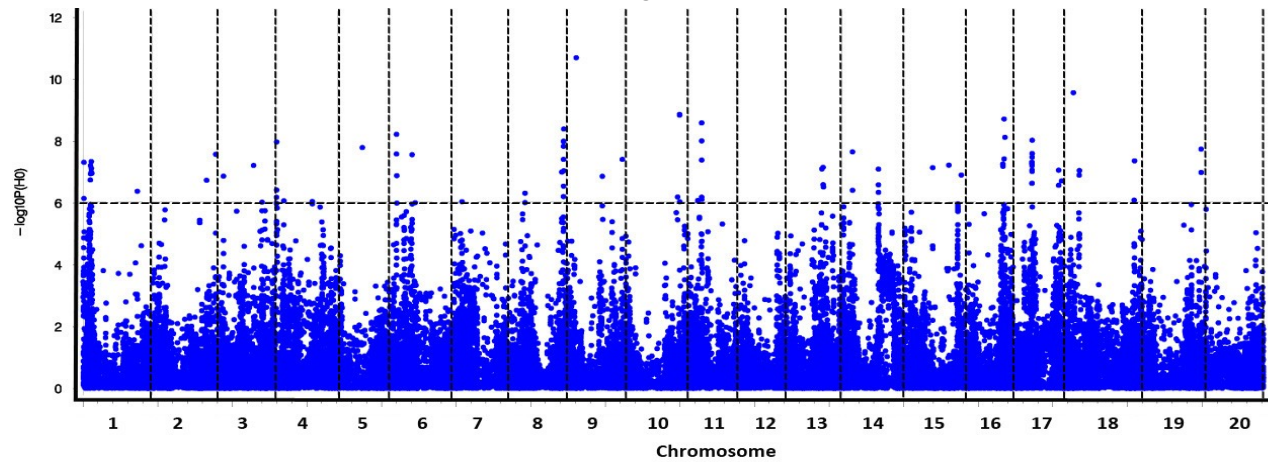

Seed length in 2011

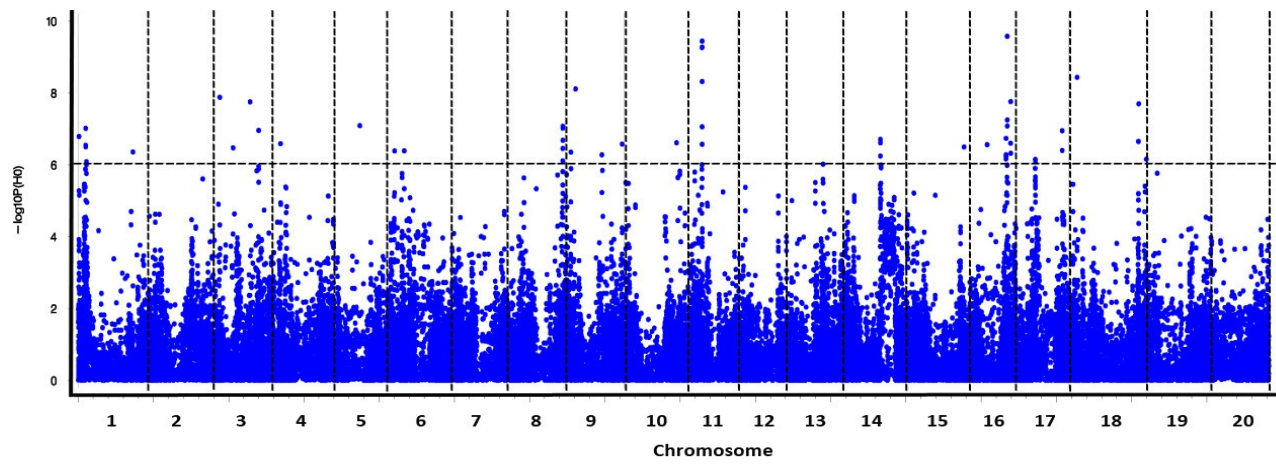

Seed length in 2012

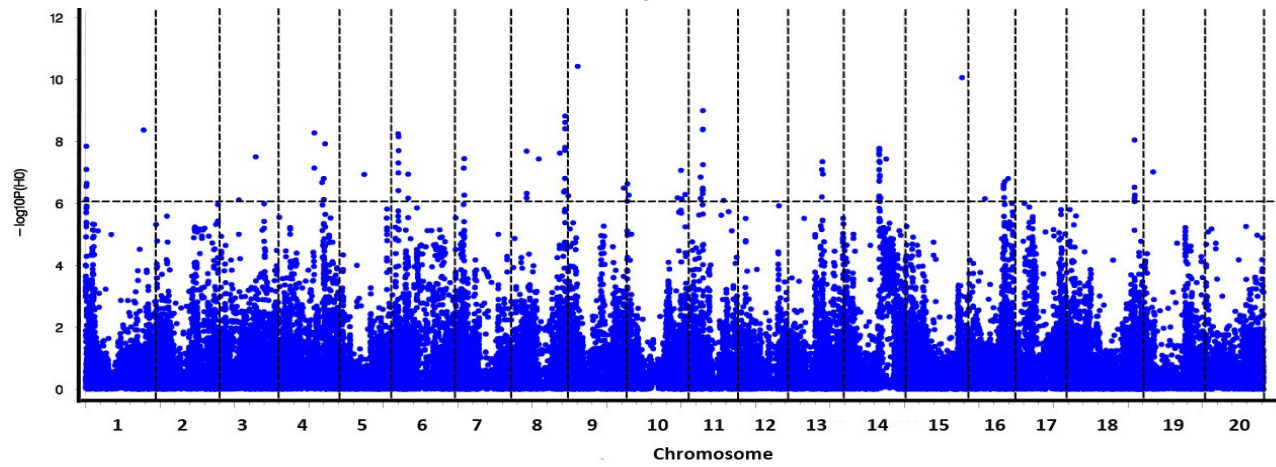

Seed width in 2008



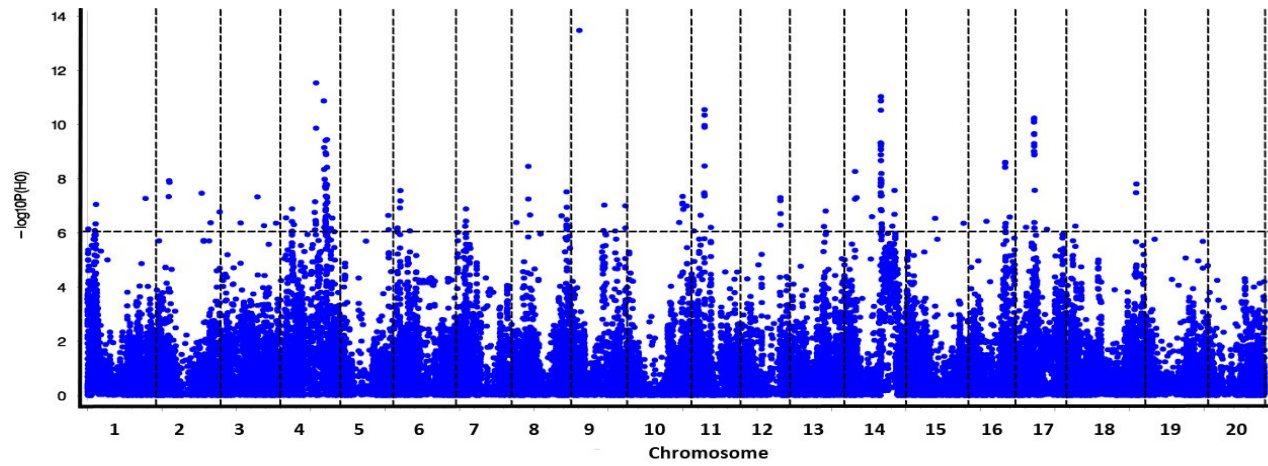

Seed width in 2009

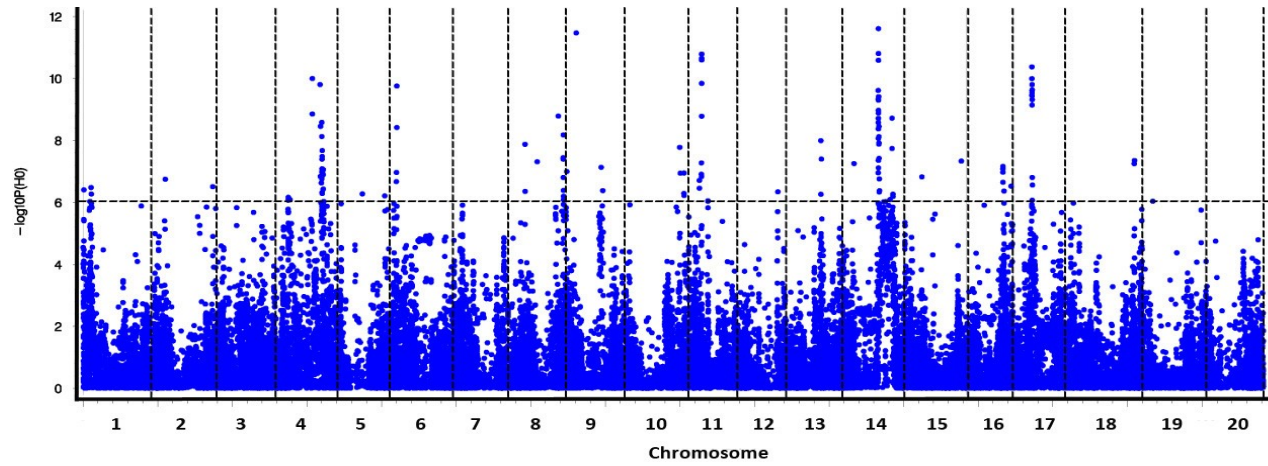

Seed width in 2010



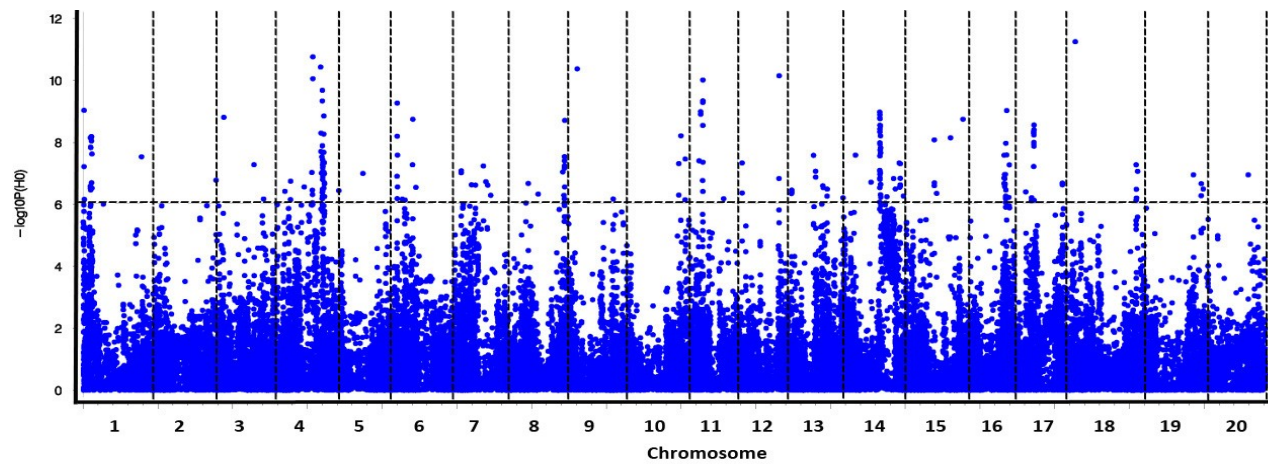

Seed width in 2011

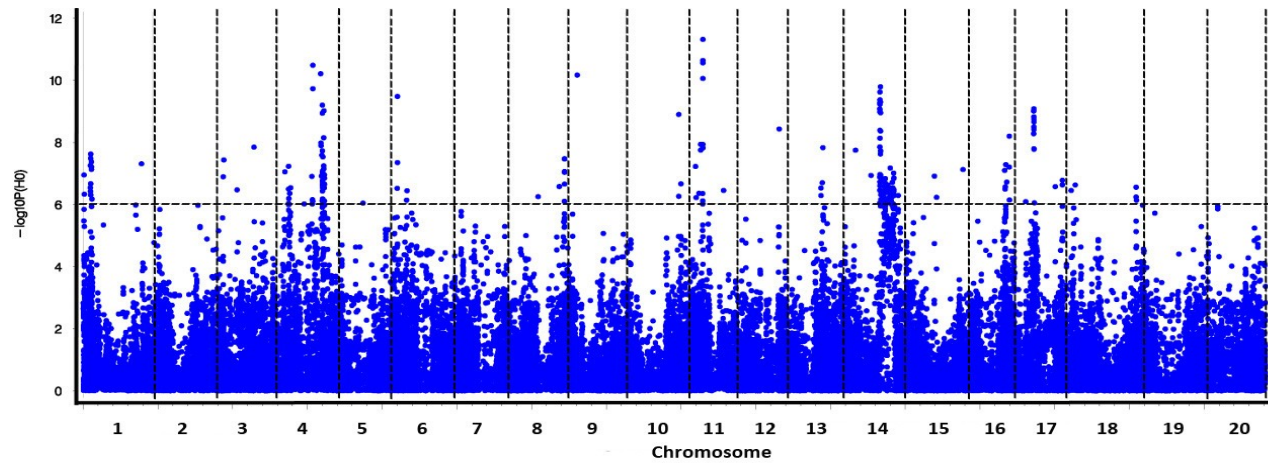

Seed width in 2012

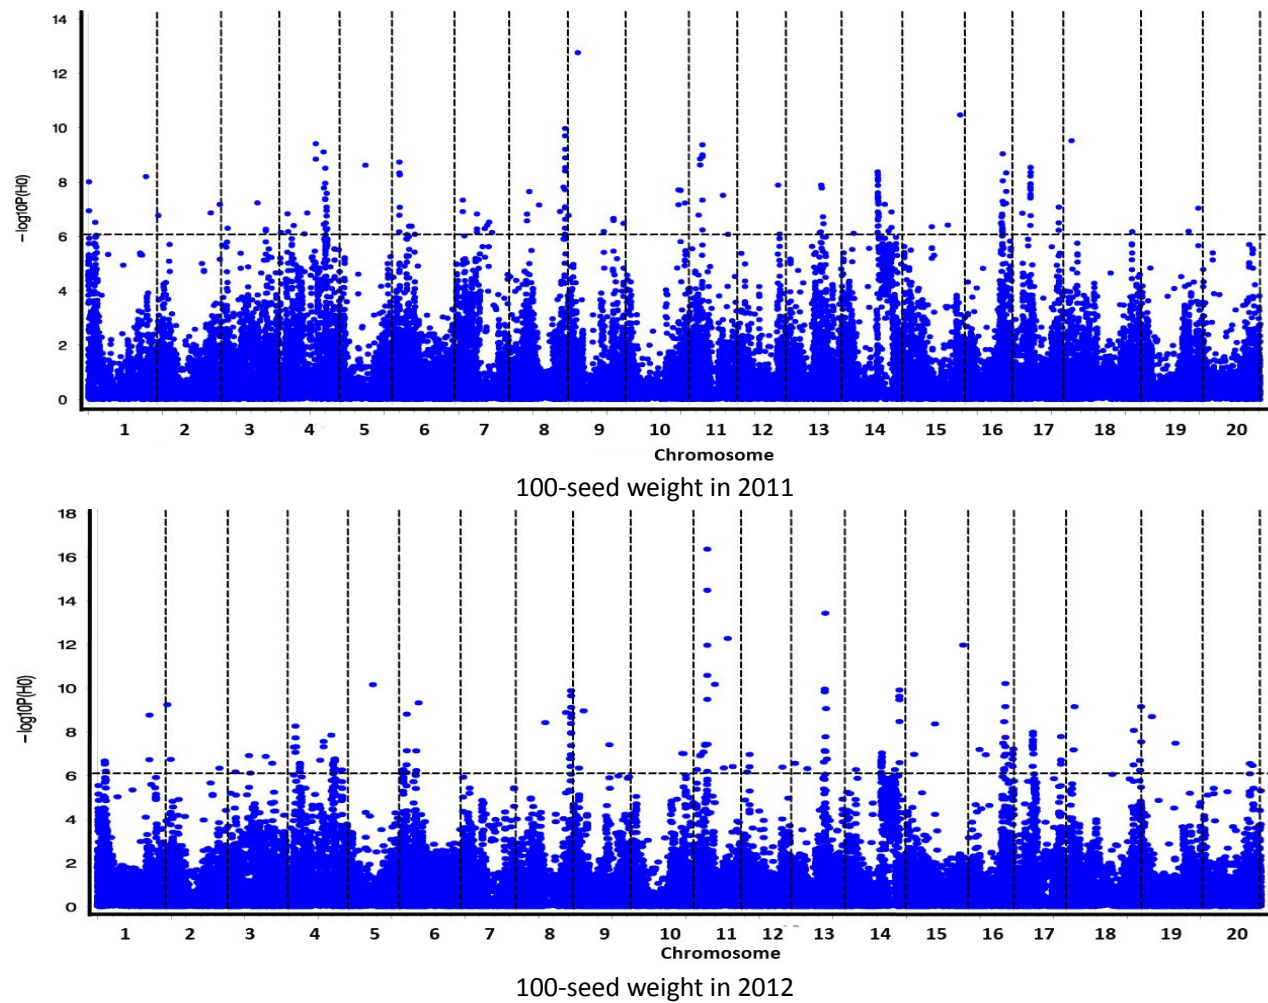

Figure S1. Genome-wide association studies of first and full flowering time, seed length, seed width and 100-seed weight in soybean during

**2008-2012 based on 55,052 SNPs.** The genomic positions of SNPs on chromosomes 1 to 20 were 7166-55874947, 2395-51643854, 45230-47773436, 15992-49228296, 9016-41933701, 1142-50641309, 37534-44659030, 3583-46944564, 25976-46841908, 24539-50962464, 30293-39163227, 13701-40093893, 10047-44402574, 13165-49710404, 8319-50879005, 14132-37370388, 47058-41905331, 426-62303776, 9282-50584403 and 18252-46703751 (bp), respectively.

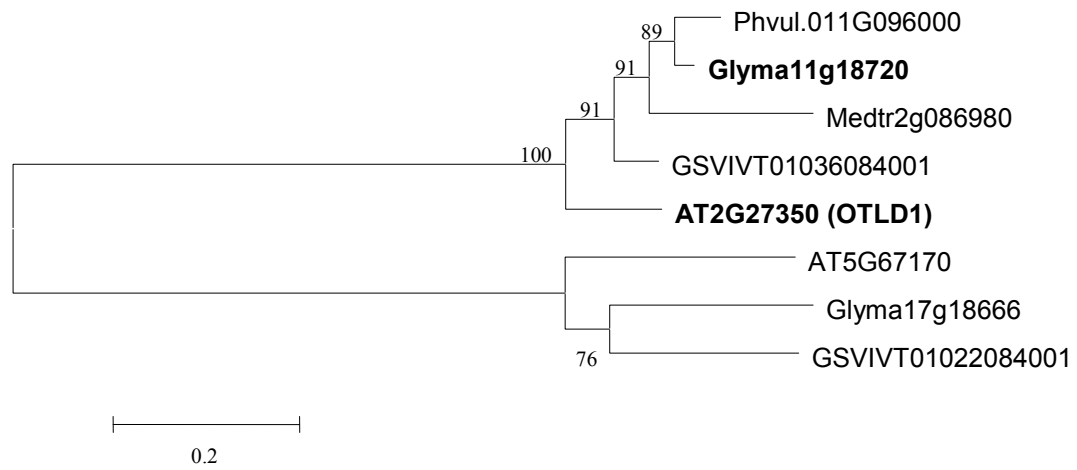

**Figure S2. Phylogenetic analysis for the gene family of *Glyma11g18720*.** The tree, and all those given in the figures below, was constructed using the neighbor joining method implemented in MEGA 5.0.



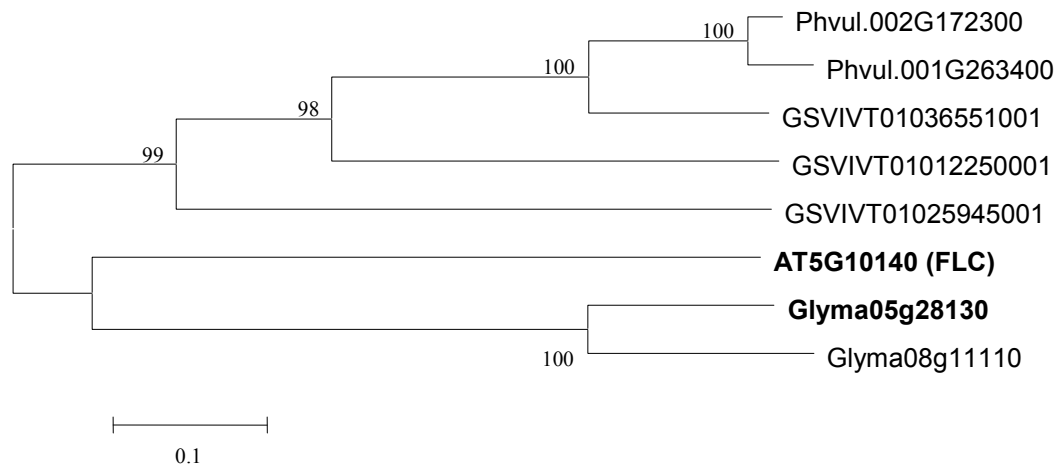

**Figure S3. Phylogenetic analysis for the gene family of *Glyma05g28130*.**

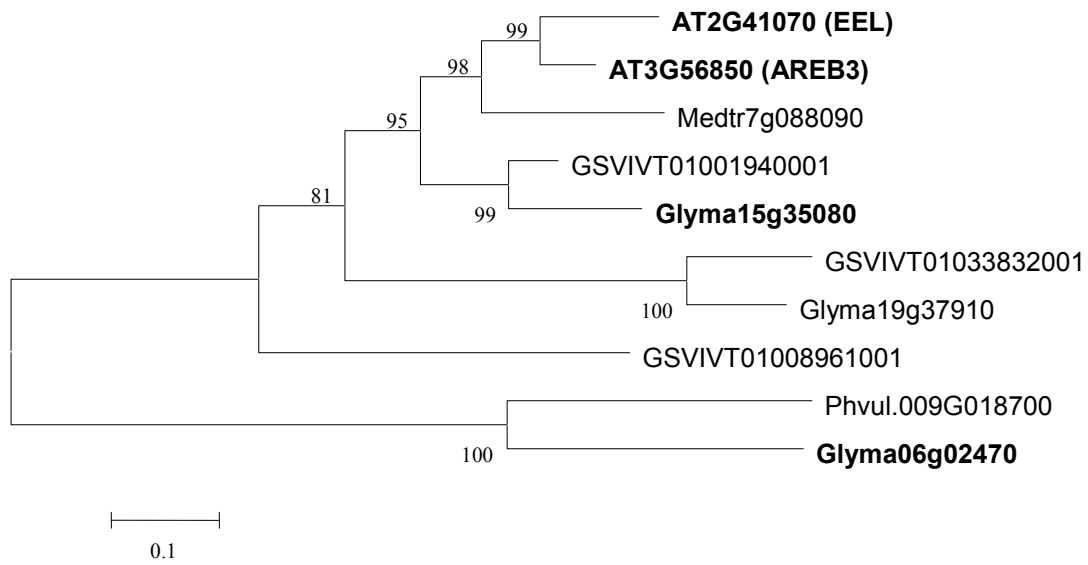

Figure S4. Phylogenetic analysis of the gene family of *Glyma15g35080* and *Glyma06g02470*.

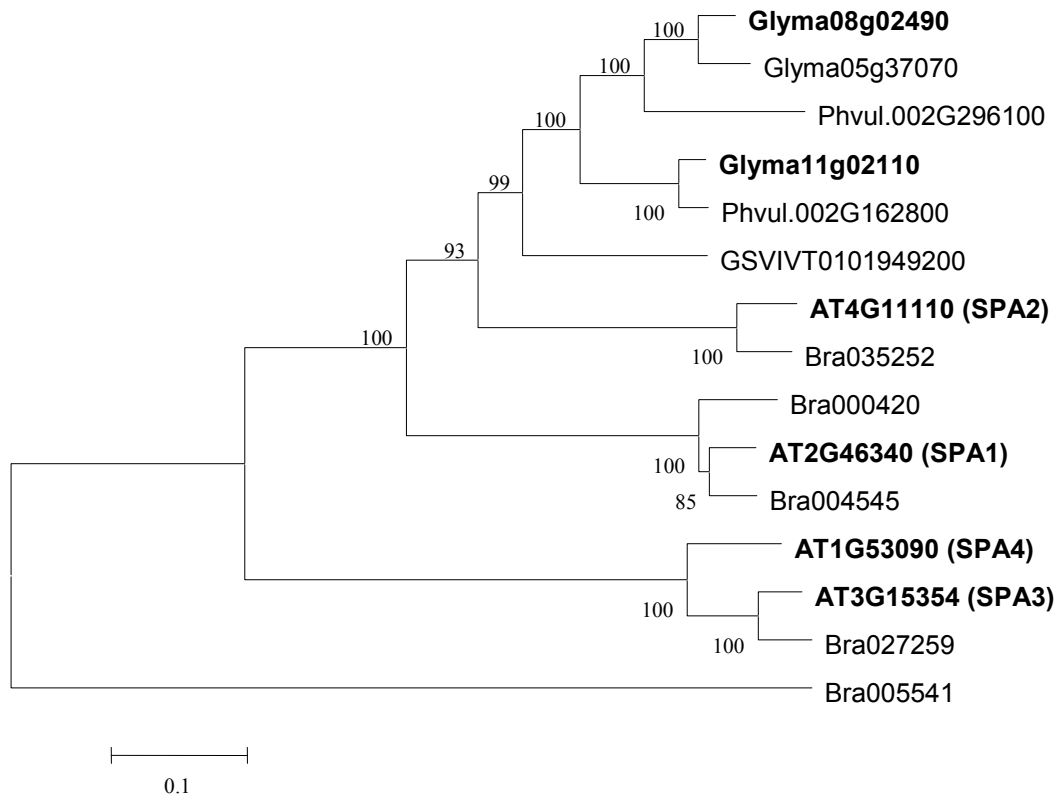

Figure S5. Phylogenetic analysis for the gene family of *Glyma08g02490* and *Glyma11g02110*.

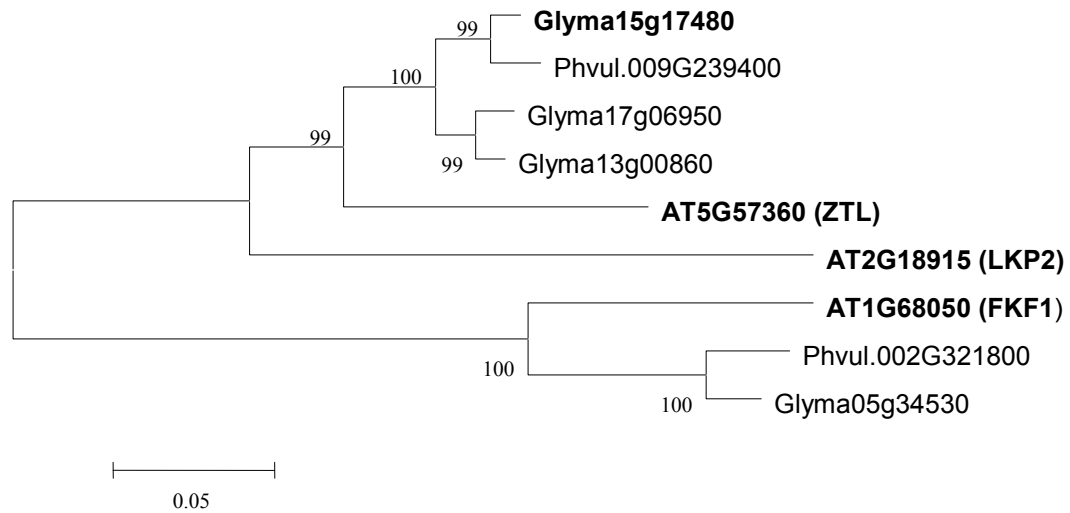

**Figure S6. Phylogenetic analysis for the gene family of *Glyma15g17480*.**



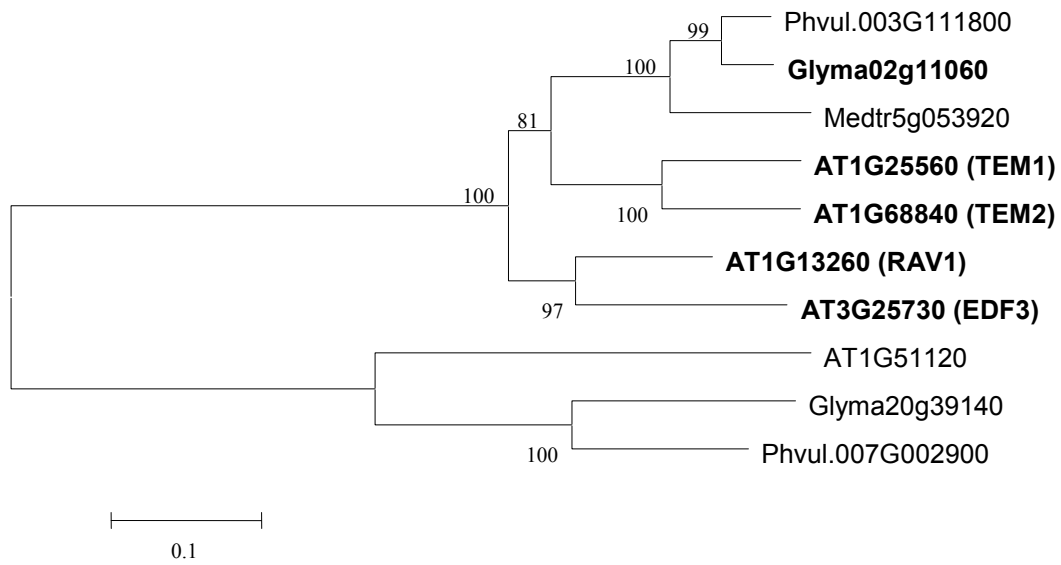

Figure S7. Phylogenetic analysis for the gene family of *Glyma02g11060*.

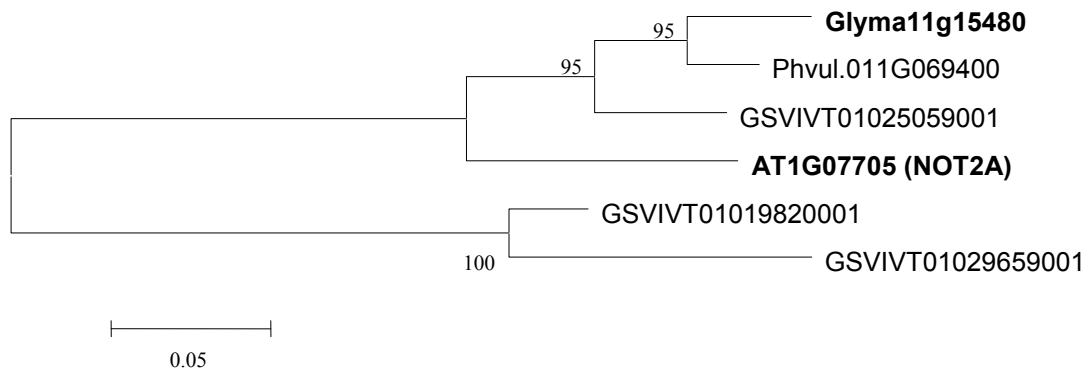

Figure S8. Phylogenetic analysis for the gene family of *Glyma11g15480*.

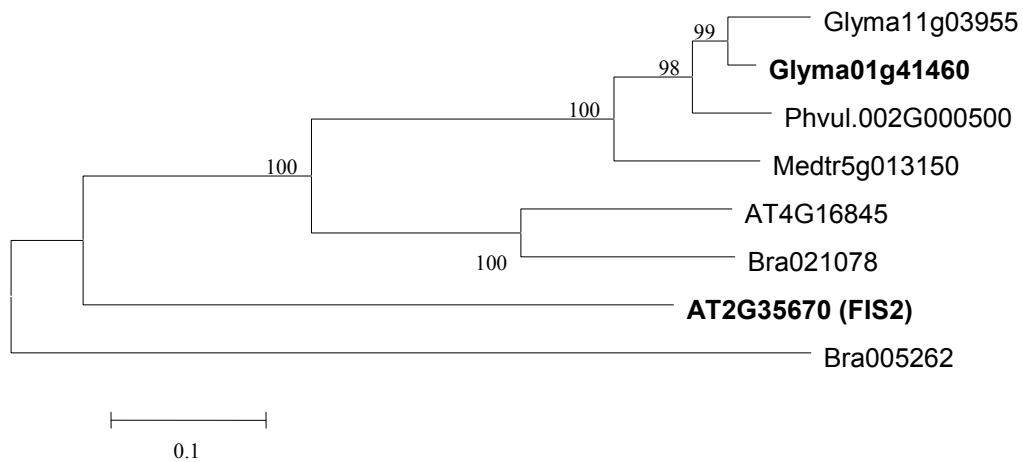

Figure S9. Phylogenetic analysis for the gene family of *Glyma01g41460*.

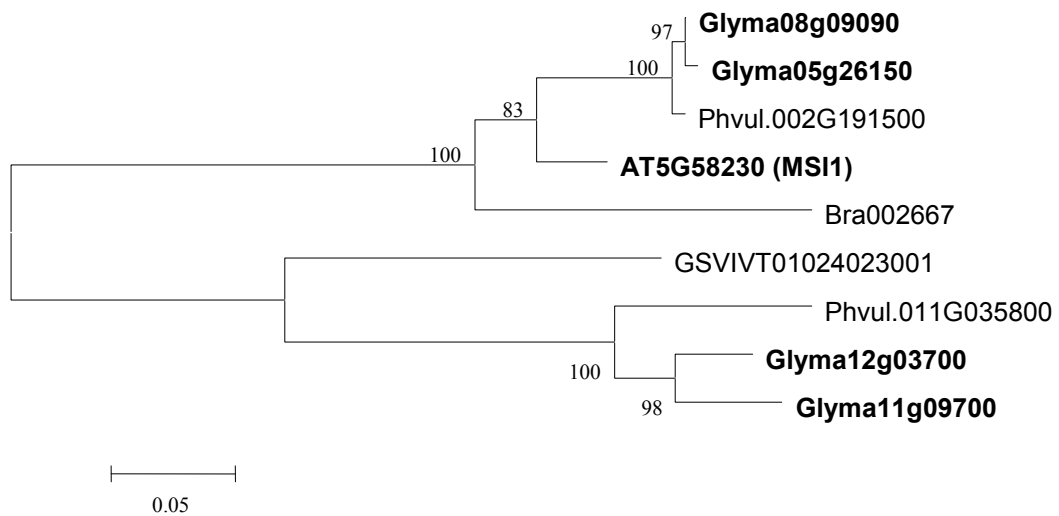

**Figure S10. Phylogenetic analysis for the gene family of *Glyma08G09090*, *Glyma05g26150*, *Glyma11g09700* and *Glyma12g3700*.**

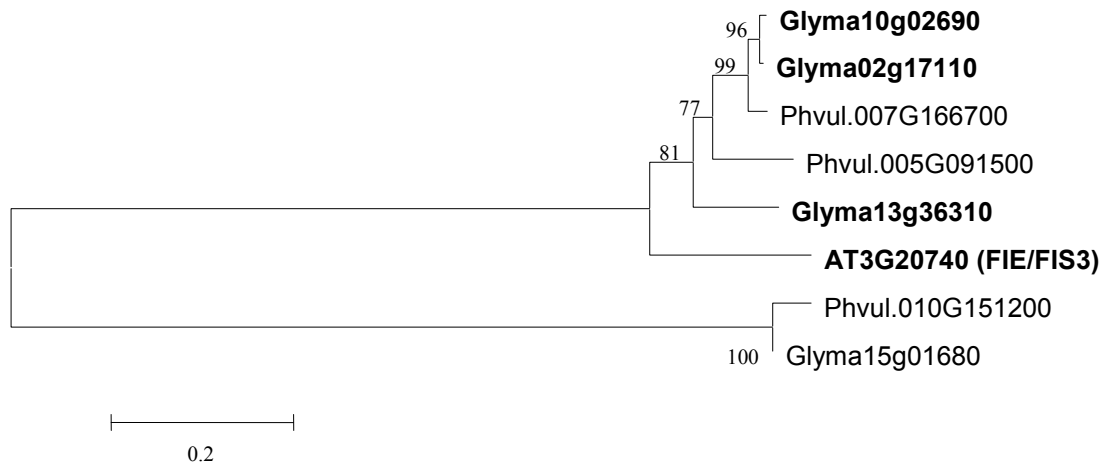

**Figure S11.** Phylogenetic analysis for the gene family of *Glyma02g17110*, *Glyma10g02690* and *Glyma13g36310*.



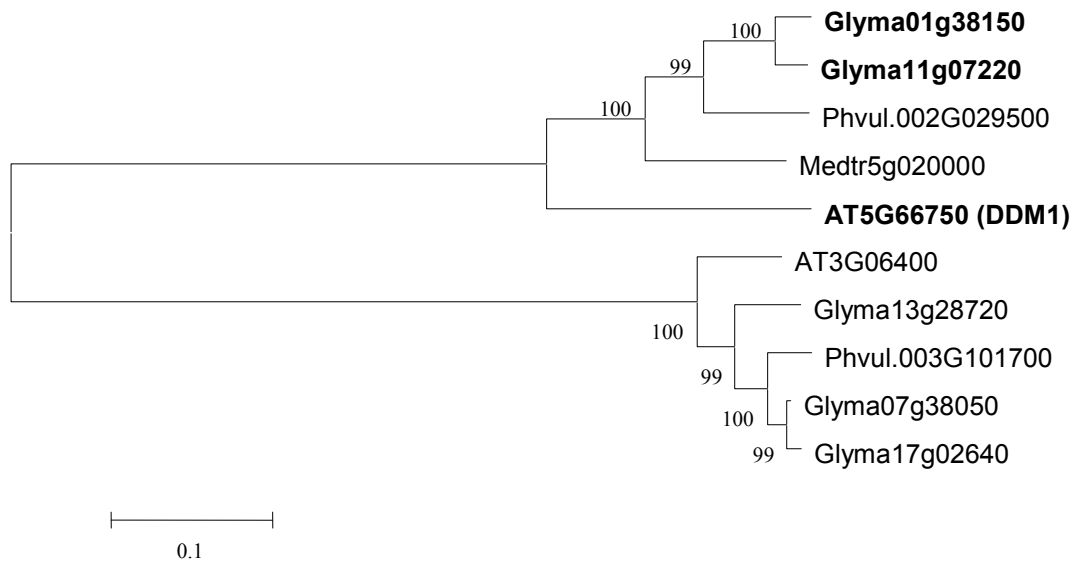

**Figure S12.** Phylogenetic analysis for the gene family of *Glyma01g38150* and *Glyma11g07220*.

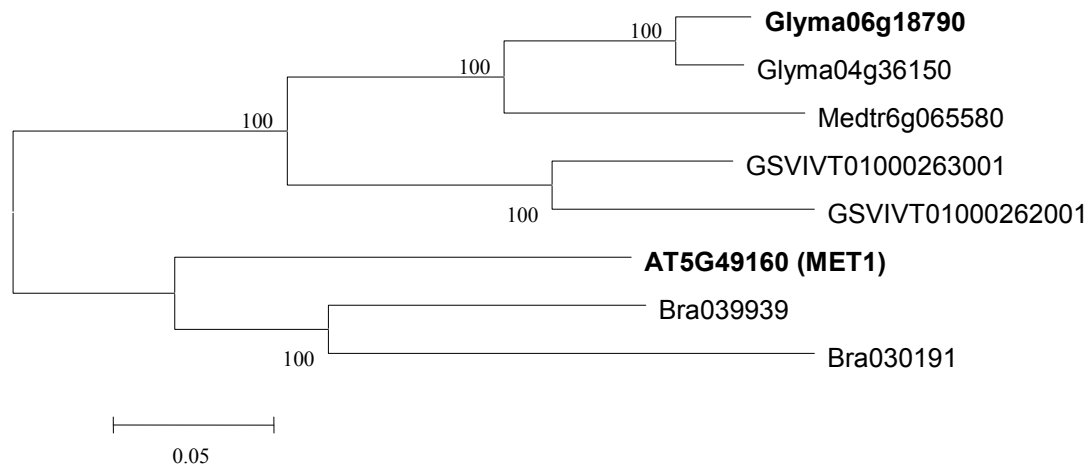

**Figure S13.** Phylogenetic analysis for the gene family of *Glyma06g18790*.

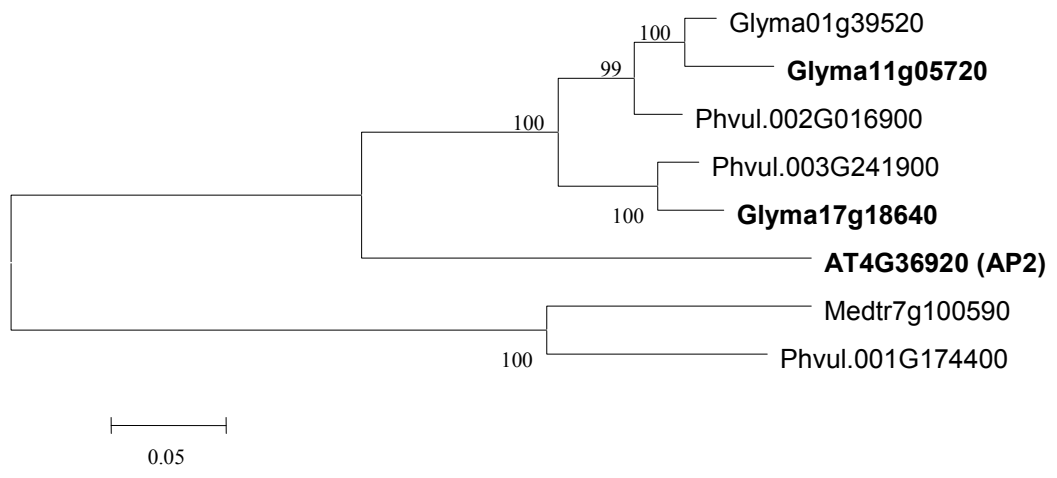

Figure S14. Phylogenetic analysis of the gene family of *Glyma11g05720* and *Glyma17g18640*.

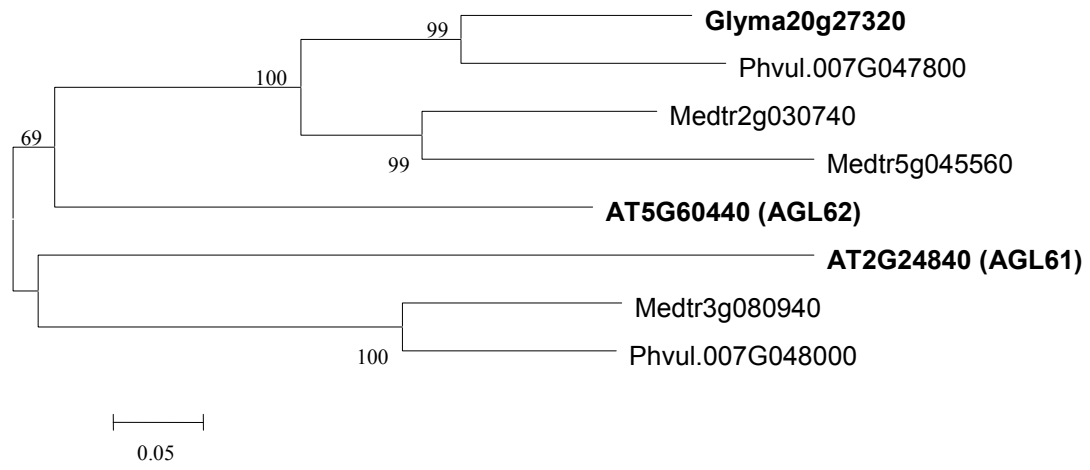

**Figure S15. Phylogenetic analysis for the gene family of *Glyma20g27320*.**



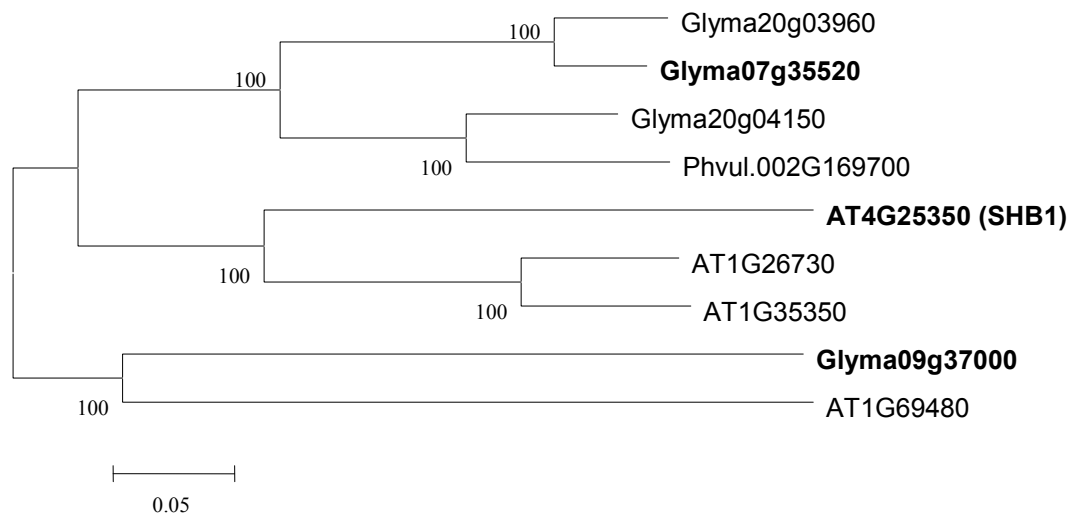

**Figure 16. Phylogenetic analysis for the gene family of *Glyma07g35520* and *Glyma09g37000*.**

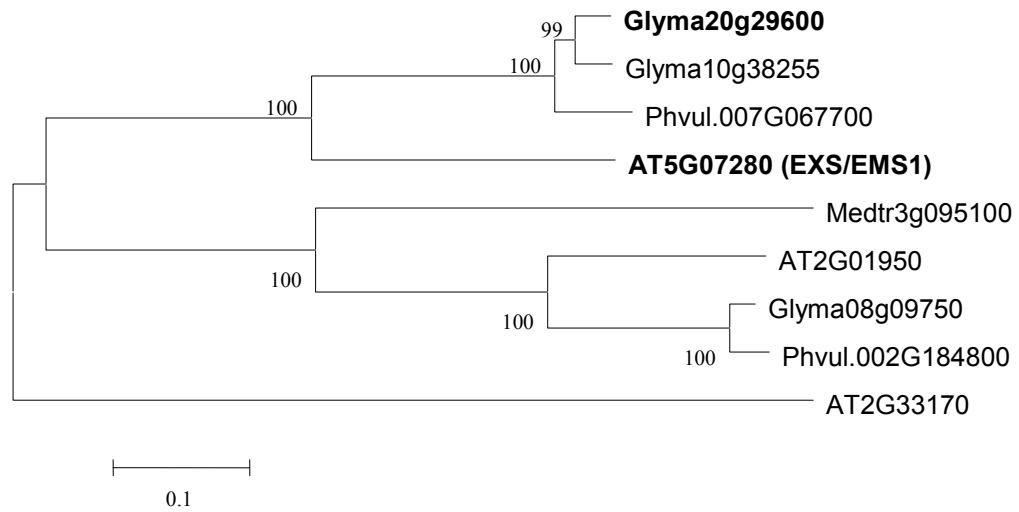

Figure S17. Phylogenetic analysis for the gene family of *Glyma20g29600*.

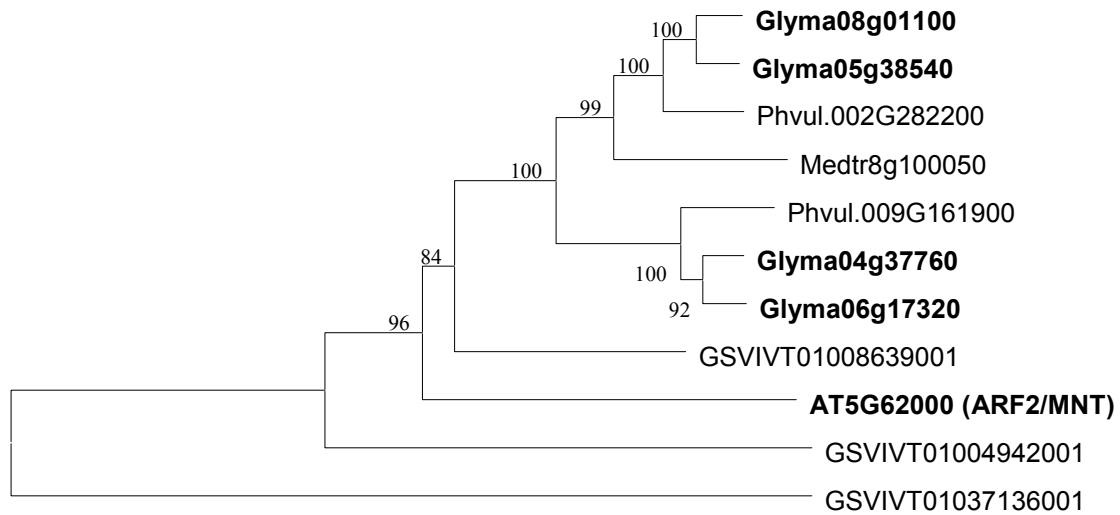

0.05

Figure S18. Phylogenetic analysis for the gene family of *Glyma04g37760*, *Glyma05g38540*, *Glyma06g17320* and *Glyma08g01100*.

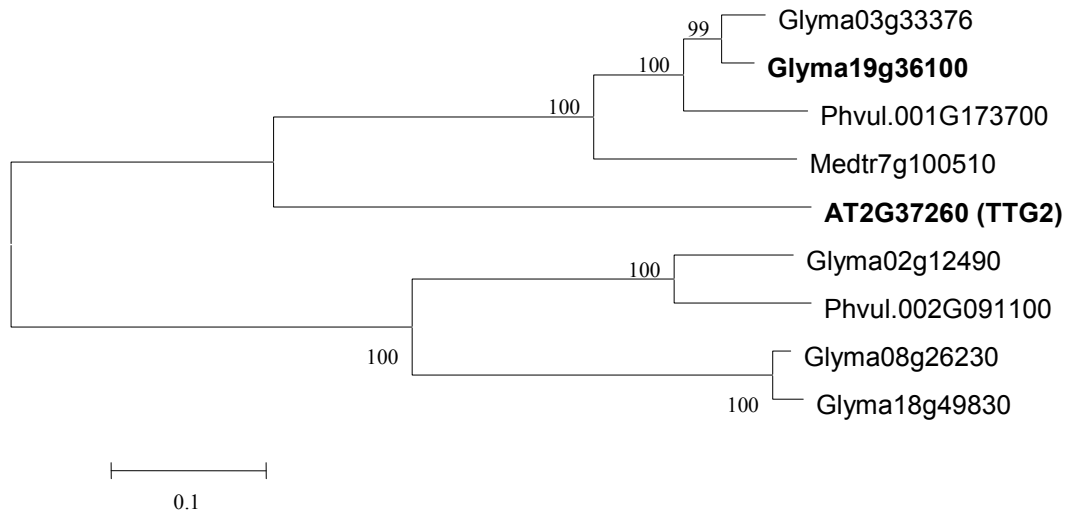

Figure S19. Phylogenetic analysis for the gene family of *Glyma19g36100*.

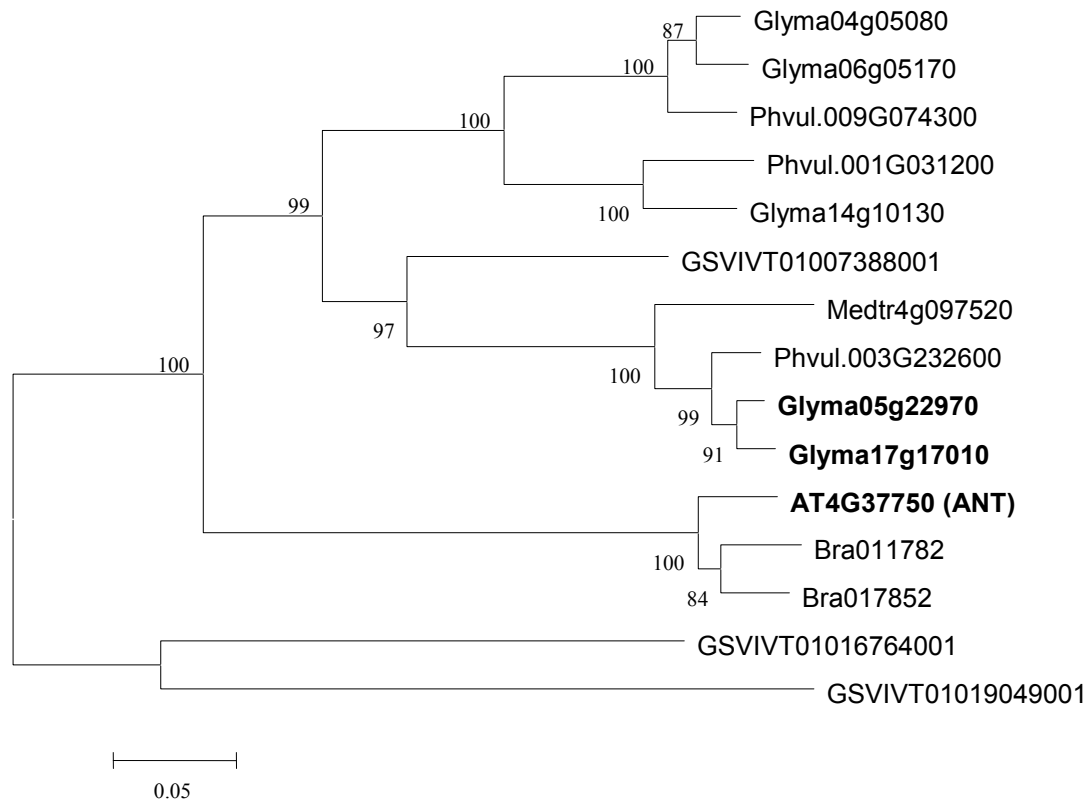

**Figure S20. Phylogenetic analysis for the gene family of *Glyma05g22970* and *Glyma17g17010*.**

**Table S1. Domestication-related loci in soybean genome determined by  $\chi^2$  test of independence, U-test and genetic diversity analysis**

| Chr. | Position (bp) | $\chi^2$ ( $-\log_{10} P$ ) | U ( $-\log_{10} P$ ) | F <sub>ST</sub> | Chr. | Position (bp) | $\chi^2$ ( $-\log_{10} P$ ) | U ( $-\log_{10} P$ ) | F <sub>ST</sub> | Chr. | Position (bp) | $\chi^2$ ( $-\log_{10} P$ ) | U ( $-\log_{10} P$ ) | F <sub>ST</sub> |
|------|---------------|-----------------------------|----------------------|-----------------|------|---------------|-----------------------------|----------------------|-----------------|------|---------------|-----------------------------|----------------------|-----------------|
| 1    | 1639236       | 19.15(6.33)                 | -4.18(4.53)          | 0.7878          | 11   | 15299054      | 30.64(6.65)                 | -2.74(2.21)          | 0.5884          | 15   | 39607166      | 32.10(6.97)                 | -3.89(3.40)          | 0.6496          |
| 1    | 2773896       | 29.71(6.45)                 | -4.04(4.27)          | 0.5819          | 11   | 15311868      | 33.87(7.36)                 | -4.28(4.73)          | 0.76            | 15   | 41394266      | 42.58(9.25)                 | -2.95(2.50)          | 0.6405          |
| 1    | 2829130       | 31.54(6.85)                 | -4.19(6.05)          | 0.8063          | 11   | 15352584      | 44.21(9.60)                 | -2.37(1.75)          | 0.566           | 15   | 41406180      | 46.09(10.00)                | -3.87(3.97)          | 0.7532          |
| 6    | 8118481       | 29.77(6.46)                 | -5.93(8.53)          | 0.8518          | 11   | 15362036      | 45.45(9.87)                 | -2.43(1.82)          | 0.5656          | 15   | 41495011      | 31.63(6.87)                 | -3.61(3.51)          | 0.6906          |
| 6    | 12953089      | 31.77(6.90)                 | -5.81(8.22)          | 0.8665          | 11   | 15363309      | 49.74(10.80)                | -2.22(1.58)          | 0.5964          | 15   | 41547491      | 29.41(6.39)                 | -3.47(3.29)          | 0.5352          |
| 6    | 15695551      | 31.93(6.94)                 | -3.58(6.44)          | 0.8506          | 11   | 15385477      | 48.87(10.61)                | -2.88(2.40)          | 0.6045          | 15   | 41547525      | 32.84(7.13)                 | -3.56(3.42)          | 0.7176          |
| 6    | 15896953      | 32.05(6.96)                 | -3.58(3.47)          | 0.6664          | 11   | 15385495      | 48.84(10.61)                | -2.88(2.40)          | 0.6045          | 15   | 41698739      | 32.90(7.15)                 | -4.30(4.77)          | 0.7365          |
| 7    | 10165145      | 29.53(6.41)                 | -5.05(6.36)          | 0.823           | 11   | 15395305      | 47.79(10.38)                | -2.36(1.74)          | 0.5285          | 15   | 41698758      | 32.90(7.15)                 | -4.30(4.77)          | 0.7365          |
| 9    | 46354191      | 36.36(7.90)                 | -3.82(3.88)          | 0.6743          | 12   | 5895633       | 37.23(8.08)                 | -3.73(3.71)          | 0.7344          | 15   | 41729760      | 31.53(6.85)                 | -3.43(3.23)          | 0.6878          |
| 9    | 46504193      | 37.20(8.08)                 | -3.24(2.93)          | 0.6329          | 12   | 5895655       | 38.04(8.26)                 | -4.30(4.78)          | 0.783           | 15   | 41770224      | 29.42(6.39)                 | -3.10(2.72)          | 0.6303          |
| 11   | 10957940      | 30.60(6.64)                 | -2.36(1.74)          | 0.489           | 12   | 5895785       | 38.74(8.41)                 | -4.19(4.55)          | 0.7938          | 16   | 5682870       | 29.37(6.38)                 | -3.80(3.83)          | 0.646           |
| 11   | 11111516      | 38.40(8.34)                 | -2.53(1.95)          | 0.5069          | 12   | 5957099       | 30.47(6.62)                 | -2.78(2.27)          | 0.6017          | 16   | 30207175      | 30.67(6.66)                 | -3.47(3.28)          | 0.5348          |
| 11   | 15142904      | 32.74(7.11)                 | -4.18(4.54)          | 0.7219          | 12   | 33215509      | 30.36(6.59)                 | -7.44(13.01)         | 0.9297          | 16   | 30210113      | 30.90(6.71)                 | -3.74(3.74)          | 0.6148          |
| 11   | 15147848      | 31.53(6.84)                 | -4.19(4.55)          | 0.7355          | 13   | 7661137       | 30.18(6.55)                 | -3.41(3.19)          | 0.6441          | 17   | 2690293       | 30.44(6.61)                 | -3.41(3.19)          | 0.6305          |
| 11   | 15170736      | 32.34(7.02)                 | -3.52(3.37)          | 0.6606          | 13   | 22953389      | 31.28(6.79)                 | -2.15(1.51)          | 0.4702          | 17   | 2690302       | 30.44(6.61)                 | -3.41(3.19)          | 0.6305          |
| 11   | 15252435      | 39.57(6.42)                 | -4.52(5.22)          | 0.6178          | 15   | 34325359      | 33.85(7.35)                 | -2.03(1.38)          | 0.4995          | 17   | 3193537       | 35.17(7.64)                 | -2.72(2.18)          | 0.5653          |

**Table S2. SNPs and allele frequencies of SNPs in the coding (bold) and non-coding regions of eight candidate genes of flowering time or seed size in wild and cultivated soybeans**

| Gene          | Position (bp)     | SNPs and allele frequency in this study |            |                          |               | SNPs & allele frequency in Chung et al. (2014) |            |                        |              | SNPs and allele frequency in Lam et al. (2010) |            |                         |               |                 |            |                         |               |
|---------------|-------------------|-----------------------------------------|------------|--------------------------|---------------|------------------------------------------------|------------|------------------------|--------------|------------------------------------------------|------------|-------------------------|---------------|-----------------|------------|-------------------------|---------------|
|               |                   | Position                                | REF/ALT    | Cultivated soybean (272) | Wild(14)      | Position                                       | REF/ALT    | Cultivated soybean(10) | Wild(6)      | Position                                       | REF/ALT    | Cultivated soybean (17) | Wild(14)      | Position        | REF/ALT    | Cultivated soybean (17) | Wild(14)      |
| Glyma11g15300 | 10946180-10950711 |                                         |            |                          |               | 10946907                                       | C/A        | 2A/8C                  | 3A/3C        | 10946191                                       | A/G        | 1G/16A                  | 0G/14A        | 10949117        | G/A        | 3A/11G                  | 0A/13G        |
|               |                   |                                         |            |                          |               |                                                |            |                        |              | 10946907                                       | C/A        | 2A/11C                  | 1A/10C        | 10949523        | C/A        | 4A/12C                  | 0A/14C        |
|               |                   |                                         |            |                          |               |                                                |            |                        |              | 10947023                                       | T/C        | 2C/11T                  | 0C/14T        | <b>10950148</b> | <b>G/A</b> | <b>4A/11G</b>           | <b>0A/14G</b> |
|               |                   |                                         |            |                          |               |                                                |            |                        |              | <b>10947579</b>                                | <b>T/A</b> | <b>4A/12T</b>           | <b>1A/13T</b> | <b>10950185</b> | <b>A/G</b> | <b>3G/12A</b>           | <b>0G/14A</b> |
|               |                   |                                         |            |                          |               |                                                |            |                        |              | <b>10947751</b>                                | <b>G/T</b> | <b>2T/12C</b>           | <b>0T/14C</b> | 10950511        | G/C        | 10C/5G                  | 0C/14G        |
|               |                   |                                         |            |                          |               |                                                |            |                        |              | <b>10948541</b>                                | <b>C/T</b> | <b>3T/13C</b>           | <b>0T/14C</b> | 10950711        | T/A        | 2A/13T                  | 0A/14T        |
| Glyma11g15480 | 11108543-11116620 | <b>11111516</b>                         | <b>C/A</b> | <b>181A/67C</b>          | <b>11A/2C</b> | 11110941                                       | C/T        | 1T/9C                  | 5T/1C        | 11108571                                       | C/T        | 9T/6C                   | 1T/12C        | 11112550        | C/A        | 3A/12C                  | 0A/14C        |
|               |                   |                                         |            |                          |               | <b>11111516</b>                                | <b>C/A</b> | <b>2A/8C</b>           | <b>5A/1C</b> | 11108675                                       | G/T        | 2T/15G                  | 0T/14G        | 11112715        | C/A        | 2A/14C                  | 0A/14C        |
|               |                   |                                         |            |                          |               | 11113542                                       | T/G        | 1G/9T                  | 5G/1T        | 11108709                                       | G/C        | 3C/13G                  | 0C/14G        | 11112897        | T/C        | 2C/12T                  | 0C/14T        |
|               |                   |                                         |            |                          |               | 11113572                                       | T/G        | 2G/8T                  | 5G/1T        | 11108728                                       | G/T        | 2T/14G                  | 0T/14G        | 11113208        | A/T        | 2T/1A                   | 0T/11A        |
|               |                   |                                         |            |                          |               | 11113586                                       | A/G        | 1G/9A                  | 5G/1A        | 11108817                                       | T/A        | 6A/8T                   | 1A/13T        | 11113209        | G/A        | 2A/1G                   | 0A/11G        |
|               |                   |                                         |            |                          |               | <b>11113620</b>                                | <b>T/C</b> | <b>2C/8T</b>           | <b>5C/1T</b> | 11108862                                       | G/A        | 9A/6G                   | 0A/13G        | 11113218        | A/T        | 0T/3A                   | 1T/10A        |
|               |                   |                                         |            |                          |               | 11114706                                       | G/A        | 10A/0G                 | 6A/0G        | 11108949                                       | C/T        | 2T/14C                  | 0T/13C        | 11113219        | T/A        | 1A/2T                   | 1A/10T        |
|               |                   |                                         |            |                          |               | 11115052                                       | T/C        | 2C/8G                  | 5C/1G        | 11109102                                       | T/G        | 8G/6T                   | 1G/13T        | 11113332        | T/C        | 10C/3T                  | 1C/11T        |



|                 |            |               |               |                 |            |               |               |
|-----------------|------------|---------------|---------------|-----------------|------------|---------------|---------------|
| 11109107        | T/C        | 8C/6T         | 1C/12T        | 11113369        | A/T        | 2T/2A         | 0T/12A        |
| 11109361        | G/T        | 2T/12T        | 1T/13G        | 11113398        | G/C        | 3C/2G         | 1C/12G        |
| 11109519        | G/T        | 8T/7G         | 1T/13G        | 11113542        | T/G        | 5G/10T        | 0G/14T        |
| 11109539        | G/A        | 0A/15G        | 2A/12G        | 11113572        | T/G        | 14G/2T        | 1G/13T        |
| 11109731        | T/A        | 8A/7T         | 1A/13T        | 11113586        | A/G        | 1G/14A        | 0G/14A        |
| 11109783        | G/T        | 7T/9G         | 1T/13G        | <b>11113620</b> | <b>T/C</b> | <b>13C/2T</b> | <b>1C/13T</b> |
| 11110941        | C/T        | 4T/12C        | 0T/14C        | <b>11113857</b> | <b>C/A</b> | <b>12A/3C</b> | <b>1A/13C</b> |
| 11111326        | A/T        | 2T/11A        | 0T/14A        | 11114684        | C/T        | 3T/12C        | 1T/12C        |
| 11111327        | T/A        | 2A/10T        | 0A/14T        | 11114688        | C/T        | 14T/3C        | 1T/12C        |
| 11111328        | A/T        | 2T/8A         | 0T/14A        | 11114840        | G/A        | 2A/14G        | 0A/13G        |
| 11111334        | G/T        | 2T/8G         | 0T/13G        | 11115052        | T/C        | 13C/3T        | 1C/12T        |
| <b>11111483</b> | <b>T/G</b> | <b>2G/13T</b> | <b>0G/14T</b> | 11115349        | C/A        | 2A/13C        | 0A/14C        |
| <b>11111516</b> | <b>C/A</b> | <b>13A/3C</b> | <b>1A/13C</b> | 11115356        | A/T        | 14T/3A        | 1T/13A        |
| <b>11111536</b> | <b>T/C</b> | <b>2C/13T</b> | <b>0C/14T</b> | 11115558        | T/G        | 3G/12T        | 0G/14T        |
| 11111744        | A/G        | 3G/14A        | 1G/13A        | 11115627        | G/A        | 3A/12G        | 0A/14G        |
| 11111964        | A/G        | 13G/3A        | 1G/13A        | 11115913        | C/T        | 2T/13C        | 1T/13C        |
| 11112199        | C/T        | 14T/3C        | 1T/13C        | 11116034        | A/T        | 13T/3A        | 1T/12A        |
| 11112262        | A/T        | 13T/2A        | 1T/13A        | 11116042        | C/G        | 14G/3C        | 1G/12C        |

|               |                   |                 |            |                 |              |                 |            |               |              |          |     |        |        |                 |            |               |               |
|---------------|-------------------|-----------------|------------|-----------------|--------------|-----------------|------------|---------------|--------------|----------|-----|--------|--------|-----------------|------------|---------------|---------------|
|               |                   |                 |            |                 |              |                 |            |               |              | 11112353 | A/G | 13G/3A | 1G/13A | 11116301        | A/C        | 2C/14A        | 0C/14A        |
|               |                   |                 |            |                 |              |                 |            |               |              | 11112377 | C/T | 13T/2C | 1T/13C | 11116464        | G/A        | 3A/12G        | 0A/14G        |
|               |                   |                 |            |                 |              |                 |            |               |              | 11112424 | C/T | 9T/3C  | 1T/13C | 11116542        | T/G        | 3G/13T        | 1G/13T        |
|               |                   |                 |            |                 |              |                 |            |               |              | 11112483 | T/C | 2C/13T | 1C/13T | 11116618        | C/T        | 6T/9C         | 1T/13C        |
| Glyma11g18720 | 15353228-15363245 | <b>15362036</b> | <b>A/C</b> | <b>187C/63A</b> | <b>9C/3A</b> | 15353360        | T/C        | 0C/10T        | 2C/4T        | 15353798 | C/G | 11G/3C | 1G/13C | 15359850        | A/C        | 14C/1A        | 1C/13A        |
|               |                   |                 |            |                 |              | <b>15354919</b> | <b>G/A</b> | <b>2A/8G</b>  | <b>6A/0G</b> | 15354449 | G/A | 2A/14G | 0A/14G | 15361202        | T/C        | 2C/7T         | 0C/12T        |
|               |                   |                 |            |                 |              | <b>15355349</b> | <b>C/T</b> | <b>0T/10C</b> | <b>2T/4C</b> | 15354919 | G/A | 14A/1G | 1A/13G | 15361208        | C/T        | 1T/9C         | 0T/13C        |
|               |                   |                 |            |                 |              | 15355799        | A/G        | 2G/9A         | 6G/0A        | 15355205 | T/G | 11G/1T | 1G/13T | 15361303        | G/A        | 11A/2G        | 1A/12G        |
|               |                   |                 |            |                 |              | 15356793        | T/A        | 4A/6T         | 6A/0T        | 15355387 | G/A | 11A/2G | 1A/13G | 15361852        | T/G        | 13G/2T        | 1G/13T        |
|               |                   |                 |            |                 |              | 15357681        | C/T        | 2T/8C         | 6T/0C        | 15355458 | A/G | 10G/1A | 1G/13A | 15361857        | T/G        | 2G/14T        | 0G/14T        |
|               |                   |                 |            |                 |              | 15359329        | G/A        | 0A/10G        | 2A/4G        | 15355497 | A/G | 10G/2A | 1G/13A | <b>15361982</b> | <b>G/A</b> | <b>12A/2G</b> | <b>1A/13G</b> |
|               |                   |                 |            |                 |              | 15359850        | A/C        | 2C/8A         | 6C/0A        | 15355799 | A/G | 14G/1A | 1G/13A | <b>15362036</b> | <b>A/C</b> | <b>12C/1A</b> | <b>1C/12A</b> |
|               |                   |                 |            |                 |              |                 |            |               |              | 15355854 | G/T | 15T/1G | 1T/13G | <b>15362320</b> | <b>C/A</b> | <b>0A/16C</b> | <b>1A/13C</b> |
|               |                   |                 |            |                 |              |                 |            |               |              | 15356140 | G/A | 13A/3G | 1A/12G | <b>15362396</b> | <b>T/A</b> | <b>11A/1T</b> | <b>1A/13T</b> |
|               |                   |                 |            |                 |              |                 |            |               |              | 15356793 | T/A | 17A/0T | 4A/10T | <b>15362486</b> | <b>C/A</b> | <b>1A/15C</b> | <b>0A/14C</b> |
|               |                   |                 |            |                 |              |                 |            |               |              | 15358607 | A/T | 7T/3A  | 0T/12A | 15362861        | T/A        | 4A/7T         | 0A/10T        |
|               |                   |                 |            |                 |              |                 |            |               |              | 15358630 | A/T | 4T/1A  | 1T/12A | 15363214        | C/T        | 6T/3C         | 1T/13C        |
|               |                   |                 |            |                 |              |                 |            |               |              | 15358632 | C/T | 0T/9C  | 2T/9C  | 15363219        | C/A        | 1A/5C         | 0A/14C        |

|               |                 |         |     |        |          |                |            |               |               |         |       |        |        |
|---------------|-----------------|---------|-----|--------|----------|----------------|------------|---------------|---------------|---------|-------|--------|--------|
|               |                 |         |     |        | 15359102 | G/A            | 12A/3G     | 1A/13G        | 15363220      | T/G     | 1G/5T | 0G/14T |        |
| Glyma12g08150 | 5874276-5880441 | 5875950 | A/G | 10G/0A | 6G/0A    | 5874364        | A/G        | 2G/15A        | 0G/13A        | 5876749 | T/C   | 2C/13T | 0C/11T |
|               |                 | 5876035 | A/G | 0G/10A | 3G/3A    | <b>5874611</b> | <b>C/T</b> | <b>2T/15C</b> | <b>0T/13C</b> | 5877063 | T/A   | 4A/13T | 1A/12T |
|               |                 | 5876735 | G/A | 0A/10G | 4A/2G    | 5874750        | C/T        | 2T/14C        | 0T/14C        | 5877228 | A/G   | 2G/15A | 0G/13A |
|               |                 | 5877228 | A/G | 0G/10A | 3G/3A    | 5874772        | C/A        | 2A/13C        | 0A/14C        | 5877710 | G/T   | 1T/14G | 1T/13G |
|               |                 | 5879514 | T/A | 0A/10T | 2A/4T    | 5874801        | C/T        | 2T/12C        | 1T/12C        | 5877738 | A/G   | 2G/15A | 0G/14A |
|               |                 | 5879994 | A/G | 0G/10A | 3G/3A    | 5874805        | A/C        | 3C/13A        | 0C/13A        | 5878220 | G/A   | 4A/13G | 0A/12G |
|               |                 |         |     |        |          | 5874807        | A/G        | 4G/12A        | 0G/13A        | 5878313 | A/T   | 2T/14A | 0T/14A |
|               |                 |         |     |        |          | 5874845        | T/G        | 3G/14T        | 0G/13T        | 5878370 | A/G   | 2G/14A | 0G/12A |
|               |                 |         |     |        |          | 5874848        | G/A        | 3A/14G        | 0A/13G        | 5878631 | A/G   | 3G/14A | 0G/12A |
|               |                 |         |     |        |          | <b>5874949</b> | <b>T/A</b> | <b>3C/14T</b> | <b>0A/14T</b> | 5878635 | A/T   | 3T/14A | 0T/12A |
|               |                 |         |     |        |          | 5875359        | T/G        | 3G/14T        | 0G/13T        | 5878782 | A/G   | 3G/14A | 0G/14A |
|               |                 |         |     |        |          | 5875434        | A/C        | 2C/14A        | 0C/13A        | 5878845 | T/C   | 2C/14T | 0C/13T |
|               |                 |         |     |        |          | 5875894        | C/A        | 2A/13C        | 0A/14C        | 5879422 | A/G   | 4G/12A | 0G/14A |
|               |                 |         |     |        |          | 5876279        | G/A        | 3A/14G        | 0A/11G        | 5879507 | A/C   | 1C/12A | 0C/13A |
|               |                 |         |     |        |          | 5876289        | A/G        | 2G/14A        | 0G/12A        | 5879514 | T/A   | 6A/9T  | 0A/13T |
|               |                 |         |     |        |          | 5876483        | T/G        | 4G/11T        | 0G/13T        | 5880203 | G/A   | 1A/13G | 1A/13G |
|               |                 |         |     |        |          | 5876485        | A/T        | 2T/13A        | 0T/13A        | 5880232 | A/G   | 1G/13A | 0G/14A |

|               |                 |                |            |               |                |                |               |               |               |         |        |        |        |
|---------------|-----------------|----------------|------------|---------------|----------------|----------------|---------------|---------------|---------------|---------|--------|--------|--------|
|               |                 |                |            |               | 5876618        | C/A            | 2A/12C        | 0A/12C        | 5880336       | C/T     | 4T/11C | 1T/13C |        |
|               |                 |                |            |               | 5876735        | G/A            | 4A/10G        | 1A/10G        |               |         |        |        |        |
| Glyma12g08210 | 5937860-5944400 | <b>5938534</b> | <b>C/G</b> | <b>0G/10C</b> | <b>2G/4C</b>   | 5937882        | A/G           | 9G/5A         | 3G/10A        | 5942218 | C/G    | 9G/7C  | 1G/13C |
|               |                 | 5938666        | G/C        | 0C/10G        | 2C/4G          | <b>5938534</b> | <b>C/G</b>    | <b>4G/13C</b> | <b>0G/13C</b> | 5942381 | A/T    | 4T/13A | 0T/14A |
|               |                 | 5938668        | A/C        | 0C/10A        | 6C/0A          | 5938668        | A/C           | 12C/4A        | 3C/11A        | 5943256 | G/A    | 12A/5G | 3A/11G |
|               |                 |                |            |               | 5940121        | T/C            | 10C/7T        | 1C/13T        | 5943409       | T/A     | 10A/6T | 1A/13T |        |
|               |                 |                |            |               | 5940194        | T/A            | 4A/13T        | 0A/14T        | 5943424       | T/A     | 4A/13T | 0A/14T |        |
|               |                 |                |            |               | 5941031        | A/T            | 3T/10A        | 0T/13A        | 5943775       | A/G     | 4G/13A | 0G/14A |        |
|               |                 |                |            |               | 5941085        | G/A            | 2A/15G        | 1A/13G        | 5943903       | G/A     | 2A/14G | 0A/14G |        |
|               |                 |                |            |               | 5941199        | T/C            | 2C/12T        | 1C/13T        | 5943970       | A/G     | 10G/6A | 2G/10A |        |
|               |                 |                |            |               | 5941257        | T/C            | 2C/15T        | 1C/13T        | 5944242       | T/A     | 2A/12T | 0A/10T |        |
|               |                 |                |            |               | 5941457        | G/A            | 4A/13G        | 0A/14G        | 5944381       | T/A     | 11A/4T | 3A/10T |        |
| Glyma12g08230 | 5980455-5993620 | 5980786        | A/C        | 0C/10A        | 6C/0A          | 5980716        | G/A           | 3A/12G        | 0A/14G        | 5988175 | G/C    | 0C/12G | 1C/6G  |
|               |                 | <b>5985820</b> | <b>A/T</b> | <b>0T/10A</b> | <b>5T/1A</b>   | 5980786        | A/C           | 11C/5A        | 3C/11A        | 5988557 | G/T    | 2T/6G  | 0T/9G  |
|               |                 |                |            |               | <b>5980901</b> | <b>G/T</b>     | <b>3T/12G</b> | <b>0T/14G</b> | 5988558       | T/G     | 1G/7T  | 0G/12T |        |
|               |                 |                |            |               | <b>5980962</b> | <b>A/G</b>     | <b>4G/13A</b> | <b>1G/13A</b> | 5988571       | T/C     | 3C/11T | 0C/12T |        |
|               |                 |                |            |               | <b>5981392</b> | <b>T/G</b>     | <b>3G/13T</b> | <b>0G/14A</b> | 5988679       | C/A     | 2A/13C | 0A/13C |        |
|               |                 |                |            |               | <b>5981422</b> | <b>A/G</b>     | <b>2G/13A</b> | <b>0G/14A</b> | 5988706       | C/A     | 2A/12C | 0A/13C |        |

|         |     |        |        |         |     |        |        |
|---------|-----|--------|--------|---------|-----|--------|--------|
| 5981602 | T/A | 4A/12T | 3A/11T | 5988719 | A/T | 6T/9A  | 3T/11A |
| 5981809 | G/C | 3C/14G | 0C/14G | 5989166 | G/A | 2A/13G | 0A/14G |
| 5981855 | T/C | 3C/14T | 0C/14T | 5989277 | T/A | 3A/13T | 0A/14T |
| 5981984 | T/C | 3C/14T | 0C/14T | 5989696 | G/T | 3T/14G | 0T/13G |
| 5982106 | A/T | 3T/13A | 0T/14A | 5989913 | C/A | 2A/13C | 0A/14C |
| 5982177 | T/G | 3G/14T | 0G/14T | 5990038 | A/G | 2G/14A | 0G/14A |
| 5982868 | C/A | 3A/13C | 0A/14C | 5990230 | G/T | 3T/13G | 0T/12G |
| 5982993 | C/A | 4A/12C | 0A/14C | 5990322 | C/T | 4T/12C | 0T/12C |
| 5983061 | C/G | 5G/12C | 3G/11C | 5990899 | G/A | 3A/13G | 0A/14G |
| 5983104 | C/G | 0G/17C | 2G/12C | 5991122 | G/A | 1A/15G | 0A/14G |
| 5983130 | T/A | 2A/14T | 0A/14T | 5991224 | C/A | 3A/14C | 0A/14C |
| 5983623 | A/T | 3T/12A | 0T/14A | 5991634 | T/C | 3C/14T | 0C/14T |
| 5983969 | C/T | 3T/14C | 0T/14C | 5992073 | C/T | 12T/5C | 3T/11C |
| 5984015 | C/T | 0T/15C | 2T/11C | 5992076 | T/C | 3C/13T | 0C/14T |
| 5984160 | T/C | 3C/14T | 0C/14T | 5992190 | T/G | 3G/14T | 0G/10T |
| 5984415 | C/A | 2A/13C | 0A/14C | 5992222 | G/T | 2T/13G | 0T/11G |
| 5984785 | A/C | 7C/7A  | 3C/9A  | 5992223 | G/T | 2T/13G | 0T/11G |
| 5985820 | A/T | 2T/14A | 3T/10A | 5992272 | T/A | 2A/11T | 0A/10T |

|               |                   |          |     |          |        |          |     |        |       |                |            |               |               |                 |            |               |               |
|---------------|-------------------|----------|-----|----------|--------|----------|-----|--------|-------|----------------|------------|---------------|---------------|-----------------|------------|---------------|---------------|
|               |                   |          |     |          |        |          |     |        |       | 5986211        | G/A        | 7A/9G         | 3A/10G        | <b>5992333</b>  | <b>C/T</b> | <b>2T/12C</b> | <b>1T/11C</b> |
|               |                   |          |     |          |        |          |     |        |       | 5986467        | G/A        | 3A/4G         | 0A/12G        | <b>5992340</b>  | <b>C/T</b> | <b>3T/13C</b> | <b>1T/11C</b> |
|               |                   |          |     |          |        |          |     |        |       | 5986563        | C/A        | 3A/4C         | 0A/13C        | 5992563         | T/A        | 3A/14T        | 0A/14T        |
|               |                   |          |     |          |        |          |     |        |       | 5986950        | T/G        | 4G/13T        | 3G/11T        | 5992565         | A/T        | 4T/13A        | 3T/11A        |
|               |                   |          |     |          |        |          |     |        |       | 5987298        | C/A        | 5A/10C        | 0A/11C        | <b>5992877</b>  | <b>T/C</b> | <b>3C/13T</b> | <b>0C/14T</b> |
|               |                   |          |     |          |        |          |     |        |       | 5987299        | A/C        | 1C/13A        | 2C/10A        | <b>5992902</b>  | <b>G/A</b> | <b>3A/13G</b> | <b>0A/14G</b> |
|               |                   |          |     |          |        |          |     |        |       | 5987767        | A/G        | 3G/13A        | 0G/14A        | <b>5993171</b>  | <b>A/T</b> | <b>0T/15A</b> | <b>1T/11A</b> |
|               |                   |          |     |          |        |          |     |        |       | <b>5988005</b> | <b>T/C</b> | <b>3C/14T</b> | <b>0C/14T</b> | 5993481         | C/G        | 1G/6C         | 0G/12C        |
|               |                   |          |     |          |        |          |     |        |       | 5988167        | A/G        | 2G/12A        | 0G/12A        | 5993482         | A/G        | 1G/8A         | 1G/12A        |
| Glyma15g35080 | 39604536-39609953 | 39607166 | A/G | 72G/182A | 10G/2G | 39605138 | G/A | 1A/9G  | 5A/1G | 39605138       | G/A        | 7A/9G         | 3A/11G        | 39607411        | G/A        | 2A/15G        | 1A/11G        |
|               |                   |          |     |          |        | 39605584 | T/C | 0C/10T | 3C/3T | 39605455       | C/T        | 2T/12C        | 3T/11C        | <b>39607944</b> | <b>T/A</b> | <b>13A/3T</b> | <b>7A/7T</b>  |
|               |                   |          |     |          |        | 39606116 | T/A | 2A/8T  | 6A/0T | 39605605       | C/T        | 1T/6C         | 1T/10C        | 39608678        | C/A        | 2A/14C        | 2A/11C        |
|               |                   |          |     |          |        | 39606221 | C/T | 0T/10C | 3T/3C | 39605606       | A/T        | 2T/6A         | 1T/9A         | 39608753        | T/A        | 3A/13T        | 4A/10T        |
|               |                   |          |     |          |        | 39606561 | C/A | 1A/9C  | 1A/5C | 39605608       | G/T        | 1T/7G         | 0T/10G        | 39608760        | G/T        | 2T/14G        | 2T/12G        |
|               |                   |          |     |          |        | 39606988 | G/T | 1T/9G  | 2T/4G | 39605612       | C/G        | 1G/11C        | 0G/13C        | 39608859        | C/T        | 1T/13C        | 1T/12C        |
|               |                   |          |     |          |        | 39607031 | A/T | 1T/9A  | 4T/2A | 39605664       | T/C        | 2C/11T        | 1C/13T        | 39608958        | A/G        | 0G/12A        | 1G/10A        |
|               |                   |          |     |          |        | 39607090 | A/T | 2T/8A  | 6T/0A | 39605973       | C/T        | 6T/9C         | 4T/9C         | 39608959        | A/G        | 2G/12A        | 0G/10A        |
|               |                   |          |     |          |        | 39607298 | C/T | 7T/3C  | 6T/0C | 39606068       | A/G        | 2G/15A        | 1G/13A        | 39608965        | A/T        | 10T/5A        | 8T/2A         |

|                                 |     |        |       |          |     |        |        |                 |            |              |              |
|---------------------------------|-----|--------|-------|----------|-----|--------|--------|-----------------|------------|--------------|--------------|
| 39607359                        | C/T | 1T/9C  | 1T/5C | 39606116 | T/A | 14A/3T | 6A/7T  | 39608983        | A/T        | 1T/15A       | 0T/12A       |
| 39607944                        | T/A | 2A/8T  | 6A/0T | 39606561 | C/A | 5A/11C | 3A/11C | 39609048        | A/G        | 3G/14A       | 2G/11A       |
| 39608099                        | T/A | 0A/10T | 3A/3T | 39606730 | A/G | 2G/14A | 2G/12A | 39609101        | A/G        | 3G/13A       | 3G/11A       |
| 39608760                        | G/T | 1T/9G  | 1T/5G | 39606765 | T/C | 3C/11T | 3C/10T | 39609176        | A/T        | 1T/15A       | 1T/13A       |
| 39608914                        | G/C | 0C/10G | 3C/3G | 39606826 | A/C | 2C/15A | 0C/13A | 39609291        | A/T        | 2T/14A       | 0T/14A       |
| 39609048                        | A/G | 1G/9A  | 1G/5A | 39606873 | C/A | 2A/14C | 0A/14C | 39609489        | A/T        | 1T/12A       | 1T/13A       |
| 39609137                        | A/G | 0G/10A | 3G/3A | 39606929 | A/G | 0G/16A | 2G/12A | 39609498        | G/A        | 1A/8G        | 0A/11G       |
| 39609702                        | T/A | 1A/9T  | 1A/5T | 39606988 | G/T | 6T/10G | 4T/9G  | 39609521        | T/C        | 0C/17T       | 2C/12T       |
| 39609744                        | T/G | 1G/9T  | 2G/4G | 39607031 | A/T | 5T/12A | 3T/11A | 39609576        | C/A        | 3A/14C       | 2A/12C       |
| 39609846                        | A/C | 0C/10A | 3C/3A | 39607166 | A/G | 5G/11A | 1G/12A | 39609702        | T/A        | 3A/14T       | 2A/11T       |
|                                 |     |        |       | 39607211 | C/T | 2T/13C | 0T/14C | 39609744        | T/G        | 6G/10T       | 4G/10T       |
|                                 |     |        |       | 39607298 | C/T | 16T/0C | 9T/3C  |                 |            |              |              |
| Glyma16g26030 30193624-30194977 |     |        |       | 30193928 | C/T | 0T/10T | 3T/3C  | 30193671        | A/T        | 8T/9A        | 3T/8A        |
|                                 |     |        |       | 30194803 | A/C | 3C/7A  | 6C/0A  | <b>30194022</b> | <b>C/A</b> | <b>2A/6C</b> | <b>1A/7C</b> |
|                                 |     |        |       |          |     |        |        | <b>30194029</b> | <b>T/G</b> | <b>2G/6T</b> | <b>0G/7T</b> |
|                                 |     |        |       |          |     |        |        | <b>30194032</b> | <b>C/G</b> | <b>1G/9C</b> | <b>0G/9C</b> |
|                                 |     |        |       |          |     |        |        | <b>30194034</b> | <b>G/C</b> | <b>2C/8G</b> | <b>0C/9G</b> |
|                                 |     |        |       |          |     |        |        | 30194803        | A/C        | 7C/9A        | 4C/10A       |
|                                 |     |        |       |          |     |        |        | <b>30194036</b> | <b>G/C</b> | <b>1C/8G</b> | <b>1C/7G</b> |
|                                 |     |        |       |          |     |        |        | 30194916        | G/C        | 3C/13G       | 0C/13G       |



**Table S3. Insertions in the coding (bold) and non-coding sequences of three candidate genes of flowering time or seed size in wild and cultivated soybeans**

| Gene          |                 | Position of Insertion (bp) | No of bases | Base                                                                                                                                                                                                                                                                                                                                                                                                                                                                                 |
|---------------|-----------------|----------------------------|-------------|--------------------------------------------------------------------------------------------------------------------------------------------------------------------------------------------------------------------------------------------------------------------------------------------------------------------------------------------------------------------------------------------------------------------------------------------------------------------------------------|
| Name          | Position (bp)   |                            |             |                                                                                                                                                                                                                                                                                                                                                                                                                                                                                      |
| Glyma12g08150 | 5874276-5880441 | 5875446                    | 153         | ATAGGGAAACACGAGTTACCTCATTCTATTCCTATGACAGCAAATCGTGACCCAATTTCCCACTTAATTTAAAAGCAAAGCAGAAATAATTCTTAACCTTGAGCATCAGGGATTTTAAAAGAAAAAAGAAAGAAGAAAACGACAAAGAA                                                                                                                                                                                                                                                                                                                                |
|               |                 | 5875967                    | 1           | T                                                                                                                                                                                                                                                                                                                                                                                                                                                                                    |
|               |                 | 5878444                    | 252         | ATTTTCTTATCTTTGGCAGGACAAATGAGATAAAAAGATAATTTGACTATTATGCAATAATAAAGTAAGAAGATTCCTTCTTATGAAAAGTGAATACATCCTTGAAAACAGTTTATACCACCTTTTGGTCTTTGCGTGCTTGTATCTCTTTAGGATTTGAACCTAATTTTAGTTTACAACAATAATTTTCTACCTTAACGATTTCCCTATGAGATAGGATGCAATCCAAGAAAACATCCTTTACCAAGG                                                                                                                                                                                                                            |
| Glyma12g08210 | 5937860-5944400 | 5938472                    | 321         | <b>GTAAGTTCTACTTTCTAACTAACATTAGAGCATGGAGGCTTACAACAACAAACATGGTTAATTGCTATGAATGCTGTACAGCAATAAAAATGTTTTAGGCTCATCATTTTATCTAGAAACTATGGGACATTATAACATAAAAATAACCAGCCGAAGAATACTGATATTCCAAGATTAGGTACAACCTCCTTGAAAATGCAGAGTCTGCTTCTGGCCCTCTGGCATGAAATTTAAATCAAGGAAGTCTAGTAAAAAACCCTTACCTGTGATATGATAAATTGGAGAATTTATTGCATATTTGTTTCTGGCACT</b>                                                                                                                                                      |
|               |                 | 5939365                    | 470         | <b>CCAGTGTATGTAATTAAGGTAACAAGGGTAGGAAGGAACAAATGCTGGGTTGGCCAACAACATCAGAGTCAAAGTACCATCATAGTTTCCACCTACAATTCTGCAAAGTTTGAGATTTGGAGATGGAAGAAGAGGGTTTTGGTGCAAATTAAGAAAGTCGAAGCAGCAAACAAGCAAACAAGAAAGAAAGAAAGCTATGATGGCTAATAACTAAAGCAAGAGCAATTTGAGCTGTGGCTTCATTTATCCAACCCATACACTGAAAATAAAAGAAAGGAAACCATTTAGTCCATACAAACACTTGAATAATAATGCTCCTCGTGCTATGAAACAAGCCACTTATGTTTGATGATTTCCCGAGACAATAAATTCATCTTCAGAACCTAAAGAAATCATGAACAGATGATGAGCAACATGTAGTAGCTACATCGTTTCAGATACCAGATAGCGAGAGAGGGAGA</b> |
| Glyma12g08230 | 5980455-5993620 | 5993482                    | 1           | G                                                                                                                                                                                                                                                                                                                                                                                                                                                                                    |

The results were based on sequence data of Lam *et al.* (2010).

**Table S4. Comparison of domestication genes detected in this study with domestication QTL (or genes) previously reported**

| Domestication and association analyses in this study |          |                                    |                  | Domestication gene detected by Chung et al. 2014 | Public QTL around domestication gene |                               |                     |
|------------------------------------------------------|----------|------------------------------------|------------------|--------------------------------------------------|--------------------------------------|-------------------------------|---------------------|
| Chr                                                  | Loci     | Domestication gene                 | Trait associated |                                                  | Marker associated                    | Traits                        | Reference*          |
| Gm11                                                 | 10957940 | <i>Glyma11g15310,Glyma11g15330</i> | Seed size        |                                                  | sat_128-satt519                      | seed weight 20-1, 20-3, 20-4  | Lian et al. 2010    |
| Gm11                                                 | 11111516 | <i>Glyma11g15480</i>               | Seed size        |                                                  | sat_128-satt519                      | seed weight 20-1, 20-3, 20-4  | Lian et al. 2010    |
| Gm11                                                 | 15362036 | <i>Glyma11g18720</i>               | Flowering time   |                                                  | satt519-satt583                      | reproductive stage length 8-1 | Komatsu et al. 2012 |
| Gm12                                                 | 5895633  | <i>Glyma12g08150,Glyma12g08160</i> | Flowering time   | <i>Glyma12g08150,Glyma12g08160</i>               | satt442                              | reproductive stage length 7-3 | Li et al. 2008      |
| Gm12                                                 | 5895655  | <i>Glyma12g08150,Glyma12g08160</i> | Flowering time   | <i>Glyma12g08150,Glyma12g08160</i>               | satt442                              | reproductive stage length 7-3 | Li et al. 2008      |
| Gm12                                                 | 5895785  | <i>Glyma12g08150,Glyma12g08160</i> | Flowering time   | <i>Glyma12g08150,Glyma12g08160</i>               | satt442                              | reproductive stage length 7-3 | Li et al. 2008      |
| Gm12                                                 | 5957099  | <i>Glyma12g08210,Glyma12g08230</i> | Flowering time   | <i>Glyma12g08210,Glyma12g08230</i>               | satt442                              | reproductive stage length 7-3 | Li et al. 2008      |
| Gm16                                                 | 30207175 | <i>Glyma16g26030,Glyma16g26050</i> | Seed size        |                                                  | satt215, satt547                     | seed yield 23-2, 23-3         | Guzman et al. 2007  |
| Gm16                                                 | 30210113 | <i>Glyma16g26030,Glyma16g26050</i> | Seed size        |                                                  | satt215, satt547                     | seed yield 23-2, 23-3         | Guzman et al. 2007  |
| Gm17                                                 | 2040047  | <i>Glyma17g04080</i>               |                  | <i>Glyma17g04080</i>                             |                                      |                               |                     |
| Gm17                                                 | 2690293  | <i>Glyma17g04080</i>               |                  | <i>Glyma17g04080</i>                             |                                      |                               |                     |
| Gm17                                                 | 3193537  | <i>Glyma17g04760,Glyma17g04770</i> |                  | <i>Glyma17g04760,Glyma17g04770</i>               |                                      |                               |                     |

\* References were as follows.

Chung W H, *et al.* 2014. Population structure and domestication revealed by high-depth resequencing of Korean cultivated and wild soybean genomes. *DNA Res* **21**: 153–167.

Guzman P S, *et al.* 2007. QTL associated with yield in three backcross-derived populations of soybean. *Crop Sci.* **47**:111-122.

Komatsu K, *et al.* 2012. Identification of QTL controlling post-flowering period in soybean. *Breed. Sci.* **61**(5):646-652.

Li D D, *et al.* 2008. Soybean QTL for yield and yield components associated with *Glycine soja* alleles. *Crop Sci.* **48**:571-581.

Lian Q, *et al.* 2010. QTL analysis of root traits as related to phosphorus efficiency in soybean. *Ann. Bot.* **106**(1):223-234.

**Table S5. Ecological regions of 286 soybean cultivars in China.**

| <b>NO.</b> | <b>Group</b> | <b>Origin</b> | <b>Ecological region</b> | <b>NO.</b> | <b>Group</b> | <b>Origin</b> | <b>Ecological region</b> | <b>NO.</b> | <b>Group</b> | <b>Origin</b> | <b>Ecological region</b> |
|------------|--------------|---------------|--------------------------|------------|--------------|---------------|--------------------------|------------|--------------|---------------|--------------------------|
| 001        | Landrace     | Jiangsu       | MLC                      | 043        | Landrace     | Liaoning      | NRT                      | 085        | Landrace     | Guizhou       | SWP                      |
| 002        | Landrace     | Jiangsu       | MLC                      | 044        | Landrace     | Liaoning      | NRT                      | 086        | Landrace     | Fujian        | CTS                      |
| 003        | Landrace     | Jiangsu       | MLC                      | 045        | Landrace     | Liaoning      | NRT                      | 087        | Landrace     | Guizhou       | SWP                      |
| 004        | Landrace     | Anhui         | MLC                      | 046        | Landrace     | Liaoning      | NRT                      | 088        | Landrace     | Guizhou       | SWP                      |
| 005        | Landrace     | Shandong      | HHH                      | 047        | Bred         | Liaoning      | NRT                      | 089        | Landrace     | Shaanxi       | MLC                      |
| 006        | Landrace     | Shandong      | HHH                      | 048        | Landrace     | Liaoning      | NRT                      | 090        | Landrace     | Shaanxi       | MLC                      |
| 007        | Bred         | Shandong      | HHH                      | 049        | Landrace     | Liaoning      | NRT                      | 091        | Landrace     | Shaanxi       | MLC                      |
| 008        | Landrace     | Zhejiang      | MLC                      | 050        | Landrace     | Liaoning      | NRT                      | 092        | Landrace     | Shaanxi       | MLC                      |
| 009        | Bred         | Jiangsu       | HHH                      | 051        | Landrace     | Zhejiang      | MLC                      | 093        | Landrace     | Shaanxi       | MLC                      |
| 010        | Landrace     | Fujian        | CTS                      | 052        | Bred         | Liaoning      | NRT                      | 094        | Landrace     | Shaanxi       | MLC                      |
| 011        | Landrace     | Fujian        | CTS                      | 053        | Landrace     | Zhejiang      | MLC                      | 095        | Landrace     | Shaanxi       | MLC                      |
| 012        | Landrace     | Fujian        | CTS                      | 054        | Landrace     | Beijing       | HHH                      | 096        | Landrace     | Shaanxi       | MLC                      |
| 013        | Landrace     | Fujian        | CTS                      | 055        | Landrace     | Fujian        | CTS                      | 097        | Landrace     | Shaanxi       | MLC                      |
| 014        | Landrace     | Fujian        | CTS                      | 056        | Landrace     | Fujian        | SCT                      | 098        | Landrace     | Shaanxi       | MLC                      |
| 015        | Landrace     | Jiangsu       | MLC                      | 057        | Landrace     | Fujian        | CTS                      | 099        | Landrace     | Shaanxi       | MLC                      |
| 016        | Bred         | Hainan        | SCT                      | 058        | Landrace     | Hunan         | CTS                      | 100        | Landrace     | Shaanxi       | MLC                      |

|     |          |              |     |     |          |          |     |     |          |          |     |
|-----|----------|--------------|-----|-----|----------|----------|-----|-----|----------|----------|-----|
| 017 | Landrace | Shanghai     | MLC | 059 | Landrace | Hunan    | CTS | 101 | Landrace | Shaanxi  | MLC |
| 018 | Bred     | Heilongjiang | NRT | 060 | Bred     | Hunan    | CTS | 102 | Bred     | Jiangsu  | MLC |
| 019 | Landrace | Guangdong    | SCT | 061 | Landrace | Zhejiang | MLC | 103 | Bred     | Hubei    | MLC |
| 020 | Landrace | Guangdong    | SCT | 062 | Landrace | Zhejiang | CTS | 104 | Landrace | Hubei    | MLC |
| 021 | Landrace | Guangdong    | SCT | 063 | Landrace | Zhejiang | MLC | 105 | Landrace | Hubei    | MLC |
| 022 | Landrace | Guangdong    | SCT | 064 | Landrace | Zhejiang | CTS | 106 | Landrace | Hubei    | MLC |
| 023 | Landrace | Guangdong    | SCT | 065 | Landrace | Zhejiang | CTS | 107 | Landrace | Hubei    | MLC |
| 024 | Landrace | Guangdong    | SCT | 066 | Landrace | Zhejiang | CTS | 108 | Landrace | Hubei    | MLC |
| 025 | Landrace | Guangdong    | SCT | 067 | Landrace | Zhejiang | MLC | 109 | Landrace | Hubei    | MLC |
| 026 | Landrace | Guangdong    | SCT | 068 | Landrace | Zhejiang | MLC | 110 | Landrace | Hubei    | MLC |
| 027 | Landrace | Guangdong    | SCT | 069 | Landrace | Zhejiang | CTS | 111 | Landrace | Jiangxi  | MLC |
| 028 | Landrace | Guangdong    | SCT | 070 | Landrace | Zhejiang | CTS | 112 | Landrace | Jiangxi  | CTS |
| 029 | Landrace | Guangdong    | SCT | 071 | Landrace | Zhejiang | CTS | 113 | Landrace | Jiangxi  | CTS |
| 030 | Landrace | Guangdong    | SCT | 072 | Landrace | Zhejiang | CTS | 114 | Landrace | Shandong | HHH |
| 031 | Landrace | Guangdong    | SCT | 073 | Landrace | Zhejiang | MLC | 115 | Landrace | Shandong | MLC |
| 032 | Bred     | Guangdong    | SCT | 074 | Landrace | Zhejiang | CTS | 116 | Landrace | Hunan    | CTS |
| 033 | Landrace | Guangdong    | SCT | 075 | Landrace | Zhejiang | CTS | 117 | Landrace | Yunnan   | SCT |
| 034 | Landrace | Guangdong    | SCT | 076 | Landrace | Zhejiang | CTS | 118 | Landrace | Yunnan   | SWP |

|     |          |              |     |     |          |          |     |     |          |          |     |
|-----|----------|--------------|-----|-----|----------|----------|-----|-----|----------|----------|-----|
| 035 | Landrace | Guangdong    | SCT | 077 | Landrace | Zhejiang | CTS | 119 | Bred     | Jiangsu  | HHH |
| 036 | Landrace | Guangdong    | SCT | 078 | Landrace | Zhejiang | MLC | 120 | Bred     | Anhui    | HHH |
| 037 | Landrace | Liaoning     | NRT | 079 | Landrace | Hunan    | CTS | 121 | Landrace | Hunan    | CTS |
| 038 | Landrace | Liaoning     | NRT | 080 | Landrace | Zhejiang | MLC | 122 | Landrace | Guizhou  | SWP |
| 039 | Landrace | Fujian       | MLC | 081 | Landrace | Zhejiang | CTS | 123 | Landrace | Guangxi  | SWP |
| 040 | Landrace | Liaoning     | NRT | 082 | Landrace | Anhui    | MLC | 124 | Landrace | Guangxi  | SCT |
| 041 | Landrace | Liaoning     | NRT | 083 | Landrace | Anhui    | MLC | 125 | Bred     | Anhui    | MLC |
| 042 | Landrace | Liaoning     | NRT | 084 | Landrace | Guizhou  | SWP | 126 | Landrace | Jiangsu  | MLC |
| 127 | Landrace | Jiangsu      | MLC | 171 | Bred     | Anhui    | HHH | 215 | Bred     | Jiangsu  | MLC |
| 128 | Landrace | Hubei        | MLC | 172 | Bred     | Henan    | HHH | 216 | Bred     | Jiangsu  | MLC |
| 129 | Landrace | Hubei        | MLC | 173 | Bred     | Henan    | HHH | 217 | Bred     | Beijing  | HHH |
| 130 | Bred     | Jiangsu      | MLC | 174 | Bred     | Henan    | HHH | 218 | Bred     | Shandong | HHH |
| 131 | Landrace | Jiangsu      | MLC | 175 | Bred     | Henan    | HHH | 219 | Bred     | Beijing  | HHH |
| 132 | Landrace | Heilongjiang | NRT | 176 | Bred     | Henan    | HHH | 220 | Bred     | Henan    | HHH |
| 133 | Landrace | Jiangsu      | MLC | 177 | Bred     | Henan    | HHH | 221 | Bred     | Henan    | HHH |
| 134 | Bred     | Jiangsu      | MLC | 178 | Bred     | Henan    | HHH | 222 | Bred     | Henan    | HHH |
| 135 | Bred     | Shandong     | HHH | 179 | Bred     | Henan    | HHH | 223 | Bred     | Shandong | HHH |
| 136 | Landrace | Jiangsu      | MLC | 180 | Bred     | Henan    | HHH | 224 | Bred     | Shandong | HHH |

|     |          |              |     |     |          |          |     |     |      |          |     |
|-----|----------|--------------|-----|-----|----------|----------|-----|-----|------|----------|-----|
| 137 | Bred     | Anhui        | HHH | 181 | Bred     | Hebei    | HHH | 225 | Bred | Henan    | HHH |
| 138 | Bred     | Beijing      | HHH | 182 | Landrace | Beijing  | HHH | 226 | Bred | Hebei    | HHH |
| 139 | Bred     | Beijing      | HHH | 183 | Bred     | Beijing  | HHH | 227 | Bred | Henan    | HHH |
| 140 | Bred     | Heilongjiang | NRT | 184 | Landrace | Anhui    | MLC | 228 | Bred | Shandong | HHH |
| 141 | Landrace | Heilongjiang | NRT | 185 | Bred     | Anhui    | HHH | 229 | Bred | Xuzhou   | HHH |
| 142 | Bred     | Shandong     | HHH | 186 | Bred     | Henan    | HHH | 230 | Bred | Shandong | HHH |
| 143 | Bred     | Henan        | HHH | 187 | Bred     | Henan    | HHH | 231 | Bred | Jiangsu  | HHH |
| 144 | Landrace | Hubei        | MLC | 188 | Bred     | Henan    | HHH | 232 | Bred | Shandong | HHH |
| 145 | Landrace | Liaoning     | NRT | 189 | Landrace | Henan    | HHH | 233 | Bred | Shandong | HHH |
| 146 | Landrace | Sichuan      | CTS | 190 | Bred     | Henan    | HHH | 234 | Bred | Shandong | HHH |
| 147 | Landrace | Sichuan      | CTS | 191 | Landrace | Henan    | HHH | 235 | Bred | Beijing  | HHH |
| 148 | Landrace | Sichuan      | SWP | 192 | Bred     | Shandong | HHH | 236 | Bred | Hebei    | HHH |
| 149 | Landrace | Sichuan      | SWP | 193 | Bred     | Shandong | HHH | 237 | Bred | Shandong | HHH |
| 150 | Landrace | Sichuan      | CTS | 194 | Bred     | Shandong | HHH | 238 | Bred | Shandong | HHH |
| 151 | Landrace | Sichuan      | SWP | 195 | Bred     | Shandong | HHH | 239 | Bred | Shandong | HHH |
| 152 | Landrace | Sichuan      | SWP | 196 | Bred     | Shandong | HHH | 240 | Bred | Shanxi   | HHH |
| 153 | Bred     | Anhui        | MLC | 197 | Bred     | Shandong | HHH | 241 | Bred | Jiangsu  | HHH |
| 154 | Bred     | Shanxi       | HHH | 198 | Bred     | Fujian   | CTS | 242 | Bred | Henan    | HHH |

|     |          |              |     |     |          |              |     |     |      |          |     |
|-----|----------|--------------|-----|-----|----------|--------------|-----|-----|------|----------|-----|
| 155 | Bred     | Heilongjiang | NRT | 199 | Bred     | Fujian       | SCT | 243 | Bred | Shandong | HHH |
| 156 | Bred     | Heilongjiang | NRT | 200 | Bred     | Shanxi       | HHH | 244 | Bred | Shandong | HHH |
| 157 | Landrace | Zhejiang     | CTS | 201 | Landrace | Guangxi      | SWP | 245 | Bred | Shandong | HHH |
| 158 | Landrace | Zhejiang     | CTS | 202 | Bred     | Fujian       | CTS | 246 | Bred | Shandong | HHH |
| 159 | Landrace | Zhejiang     | CTS | 203 | Landrace | Fujian       | CTS | 247 | Bred | Shandong | HHH |
| 160 | Bred     | Beijing      | HHH | 204 | Bred     | Shandong     | HHH | 248 | Bred | Anhui    | HHH |
| 161 | Landrace | Beijing      | HHH | 205 | Bred     | Liaoning     | NRT | 249 | Bred | Anhui    | MLC |
| 162 | Bred     | Anhui        | MLC | 206 | Bred     | Shandong     | HHH | 250 | Bred | Shandong | HHH |
| 163 | Landrace | Fujian       | SWP | 207 | Landrace | Guangxi      | SWP | 251 | Bred | Shandong | HHH |
| 164 | Landrace | Sichuan      | SWP | 208 | Bred     | Heilongjiang | NRT | 252 | Bred | Anhui    | HHH |
| 165 | Landrace | Sichuan      | SWP | 209 | Bred     | Liaoning     | NRT | 253 | Bred | Beijing  | HHH |
| 166 | Landrace | Sichuan      | SWP | 210 | Landrace | Guangxi      | SCT | 254 | Bred | Shandong | HHH |
| 167 | Landrace | Sichuan      | SWP | 211 | Landrace | Shandong     | HHH | 255 | Bred | Jiangsu  | HHH |
| 168 | Landrace | Yunnan       | SCT | 212 | Landrace | Yunnan       | SCT | 256 | Bred | Xuzhou   | HHH |
| 169 | Bred     | Shandong     | HHH | 213 | Landrace | Jiangsu      | MLC | 257 | Bred | Hebei    | HHH |
| 170 | Landrace | Shandong     | HHH | 214 | Wild     | Liaoning     | NRT | 258 | Bred | Anhui    | HHH |
| 259 | Bred     | Shandong     | HHH | 269 | Wild     | Jilin        | NRT | 279 | Bred | Hebei    | HHH |
| 260 | Wild     | Jiangsu      | MLC | 270 | Wild     | Neimenggu    | NRT | 280 | Bred | Shandong | HHH |



|     |      |         |     |     |          |         |     |     |      |          |     |
|-----|------|---------|-----|-----|----------|---------|-----|-----|------|----------|-----|
| 261 | Wild | Jiangsu | MLC | 271 | Wild     | Jilin   | NRT | 281 | Bred | Anhui    | HHH |
| 262 | Wild | Jiangsu | MLC | 272 | Wild     | Jiangsu | MLC | 282 | Bred | Anhui    | HHH |
| 263 | Wild | Hubei   | MLC | 273 | Bred     | Jiangsu | MLC | 283 | Bred | Henan    | HHH |
| 264 | Wild | Hubei   | MLC | 274 | Bred     | Jiangsu | MLC | 284 | Bred | Henan    | HHH |
| 265 | Wild | Hubei   | MLC | 275 | Bred     | Jiangsu | MLC | 285 | Bred | Shandong | HHH |
| 266 | Wild | Hubei   | MLC | 276 | Landrace | Jiangsu | MLC | 286 | Bred | Henan    | HHH |
| 267 | Wild | Hubei   | MLC | 277 | Bred     | Henan   | HHH |     |      |          |     |
| 268 | Wild | Hubei   | MLC | 278 | Bred     | Henan   | HHH |     |      |          |     |

**Note:** Six ecological regions were as follows.

Northern single cropping, spring planting eco-region(NRT): 28;

Huanghuaihai double cropping, spring and summer planting eco-region (HHH): 101;

Middle and lower Changjiang valley double cropping, spring and summer planting eco-region(MLC): 75;

Central south multiple cropping, spring, summer and autumn planting eco-region(CTS): 38;

Southwest plateau double cropping, spring and summer planting eco-region(SWP): 18;

South China tropical multiple cropping, all season planting eco-region(SCT): 26.
